# Supplementary material for: Modification of social determinants of health by critical illness and consequences of that modification for recovery: an international qualitative study
Source: PubMed Central journal article supplement — BMJ Open. 2022 Sep 27;12(9):e060454. doi: 10.1136/bmjopen-2021-060454 (PMC9516069; doi:10.1136/bmjopen-2021-060454), 2022-09-27
Supplement: bmjopen-2021-060454.draft_revisions.pdf [file bmjopen-2021-060454.draft_revisions.pdf]

# BMJ Open

BMJ Open is committed to open peer review. As part of this commitment we make the peer review history of every article we publish publicly available.

When an article is published we post the peer reviewers' comments and the authors' responses online. We also post the versions of the paper that were used during peer review. These are the versions that the peer review comments apply to.

The versions of the paper that follow are the versions that were submitted during the peer review process. They are not the versions of record or the final published versions. They should not be cited or distributed as the published version of this manuscript.

BMJ Open is an open access journal and the full, final, typeset and author-corrected version of record of the manuscript is available on our site with no access controls, subscription charges or pay-per-view fees (<http://bmjopen.bmj.com>).

If you have any questions on BMJ Open's open peer review process please email [info.bmjopen@bmj.com](mailto:info.bmjopen@bmj.com)

# BMJ Open

## Modification of Social Determinants of Health by Critical Illness, and Consequences of that Modification for Recovery: A Multinational Qualitative Study

|                               |                                                                                                                                                                                                                                                                                                                                                                                                                                                                                                                                                                                                                                                                                                                                                                                                                                                                                                                                                                                                                                                                                                                                                                                                                                                                                                                                                                                                                                                                                                                                                                                                                                                                                                                                                                                                                                                                                                                                                                                                                                                                                                                                                                                     |
|-------------------------------|-------------------------------------------------------------------------------------------------------------------------------------------------------------------------------------------------------------------------------------------------------------------------------------------------------------------------------------------------------------------------------------------------------------------------------------------------------------------------------------------------------------------------------------------------------------------------------------------------------------------------------------------------------------------------------------------------------------------------------------------------------------------------------------------------------------------------------------------------------------------------------------------------------------------------------------------------------------------------------------------------------------------------------------------------------------------------------------------------------------------------------------------------------------------------------------------------------------------------------------------------------------------------------------------------------------------------------------------------------------------------------------------------------------------------------------------------------------------------------------------------------------------------------------------------------------------------------------------------------------------------------------------------------------------------------------------------------------------------------------------------------------------------------------------------------------------------------------------------------------------------------------------------------------------------------------------------------------------------------------------------------------------------------------------------------------------------------------------------------------------------------------------------------------------------------------|
| Journal:                      | <i>BMJ Open</i>                                                                                                                                                                                                                                                                                                                                                                                                                                                                                                                                                                                                                                                                                                                                                                                                                                                                                                                                                                                                                                                                                                                                                                                                                                                                                                                                                                                                                                                                                                                                                                                                                                                                                                                                                                                                                                                                                                                                                                                                                                                                                                                                                                     |
| Manuscript ID                 | bmjopen-2021-060454                                                                                                                                                                                                                                                                                                                                                                                                                                                                                                                                                                                                                                                                                                                                                                                                                                                                                                                                                                                                                                                                                                                                                                                                                                                                                                                                                                                                                                                                                                                                                                                                                                                                                                                                                                                                                                                                                                                                                                                                                                                                                                                                                                 |
| Article Type:                 | Original research                                                                                                                                                                                                                                                                                                                                                                                                                                                                                                                                                                                                                                                                                                                                                                                                                                                                                                                                                                                                                                                                                                                                                                                                                                                                                                                                                                                                                                                                                                                                                                                                                                                                                                                                                                                                                                                                                                                                                                                                                                                                                                                                                                   |
| Date Submitted by the Author: | 22-Dec-2021                                                                                                                                                                                                                                                                                                                                                                                                                                                                                                                                                                                                                                                                                                                                                                                                                                                                                                                                                                                                                                                                                                                                                                                                                                                                                                                                                                                                                                                                                                                                                                                                                                                                                                                                                                                                                                                                                                                                                                                                                                                                                                                                                                         |
| Complete List of Authors:     | <p>McPeake, Joanne; NHS Greater Glasgow and Clyde, Glasgow Royal Infirmary ; University of Glasgow, School of Medicine, Dentistry and Nursing</p> <p>Boehm , Leanne ; Vanderbilt University, School of Nursing</p> <p>Hibbert , Elizabeth; Western Health Foundation, Department of Physiotherapy</p> <p>Hauschildt , Katrina; VA Ann Arbor Healthcare System, Center for Clinical Management Research</p> <p>Bakhru, Rita; Wake Forest University School of Medicine, Department of Internal Medicine</p> <p>Bastin, Anthony ; Barts Health NHS Trust, Department of Peri-operative Medicine</p> <p>Butcher , Brad ; University of Pittsburgh</p> <p>Eaton , Tammy; University of Pittsburgh</p> <p>Harris , Wendy; University College London</p> <p>Hope , Aluko; Yeshiva University Albert Einstein College of Medicine</p> <p>Jackson, James; Vanderbilt University,</p> <p>Johnson , Annie; Mayo Clinic</p> <p>Kloos , Janet; University Hospitals Cleveland Medical Center</p> <p>Korzick , Karen ; Geisinger Medical Center</p> <p>McCartney , Judith; NHS Greater Glasgow and Clyde</p> <p>Meyer, Joel; Guy's and St Thomas' NHS Foundation Trust,</p> <p>Montgomery-Yates , Ashley ; University of Kentucky</p> <p>Quasim, Tara; NHS Greater Glasgow and Clyde; University of Glasgow College of Medical Veterinary and Life Sciences, School of Medicine, Dentistry and Nursing</p> <p>Slack, Andrew; King's College London, Department of Critical Care; Guy's and St Thomas' Hospitals NHS Trust, Department of Critical Care</p> <p>Wade , Dorothy ; University College London Hospitals NHS Foundation Trust</p> <p>Still , Mary; Emory University Hospital</p> <p>Netzer , Giora; University of Maryland School of Medicine</p> <p>Hopkins, Ramona ; Intermountain Medical Center, Center for Humanizing Critical Care and Pulmonary/Critical Care Medicine; Brigham Young University, Psychology and Neuroscience</p> <p>Mikkelsen , Mark; Hospital of the University of Pennsylvania</p> <p>Iwashyna, Theodore; University of Michigan,</p> <p>Haines, Kimberley; Sunshine Hospital, Physiotherapy</p> <p>Sevin , Carla ; Vanderbilt University Medical Center</p> |

1  
2  
3  
4  
5  
6  
7  
8  
9  
10  
11  
12  
13  
14  
15  
16  
17  
18  
19  
20  
21  
22  
23  
24  
25  
26  
27  
28  
29  
30  
31  
32  
33  
34  
35  
36  
37  
38  
39  
40  
41  
42  
43  
44  
45  
46  
47  
48  
49  
50  
51  
52  
53  
54  
55  
56  
57  
58  
59  
60

|           |                                                                                     |
|-----------|-------------------------------------------------------------------------------------|
| Keywords: | Adult intensive & critical care < ANAESTHETICS, PUBLIC HEALTH, QUALITATIVE RESEARCH |
|           |                                                                                     |

SCHOLARONE™  
Manuscripts

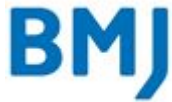

I, the Submitting Author has the right to grant and does grant on behalf of all authors of the Work (as defined in the below author licence), an exclusive licence and/or a non-exclusive licence for contributions from authors who are: i) UK Crown employees; ii) where BMJ has agreed a CC-BY licence shall apply, and/or iii) in accordance with the terms applicable for US Federal Government officers or employees acting as part of their official duties; on a worldwide, perpetual, irrevocable, royalty-free basis to BMJ Publishing Group Ltd ("BMJ") its licensees and where the relevant Journal is co-owned by BMJ to the co-owners of the Journal, to publish the Work in this journal and any other BMJ products and to exploit all rights, as set out in our [licence](#).

The Submitting Author accepts and understands that any supply made under these terms is made by BMJ to the Submitting Author unless you are acting as an employee on behalf of your employer or a postgraduate student of an affiliated institution which is paying any applicable article publishing charge ("APC") for Open Access articles. Where the Submitting Author wishes to make the Work available on an Open Access basis (and intends to pay the relevant APC), the terms of reuse of such Open Access shall be governed by a Creative Commons licence – details of these licences and which [Creative Commons](#) licence will apply to this Work are set out in our licence referred to above.

Other than as permitted in any relevant BMJ Author's Self Archiving Policies, I confirm this Work has not been accepted for publication elsewhere, is not being considered for publication elsewhere and does not duplicate material already published. I confirm all authors consent to publication of this Work and authorise the granting of this licence.

1  
2  
3 **Title: Modification of Social Determinants of Health by Critical Illness, and Consequences of that**  
4 **Modification for Recovery: A Multinational Qualitative Study**  
5  
6

7 **Joanne M. McPeake** PhD, MSc, BN (Hons), RGN \*Corresponding author

8 Glasgow Royal Infirmary, NHS Greater Glasgow and Clyde, Scotland, UK

9 School of Medicine, Dentistry and Nursing, University of Glasgow, Scotland, UK

10 THIS. Institute (University of Cambridge)

11  
12  
13  
14  
15 **Leanne M. Boehm** PhD, RN, ACNS-BC

16 School of Nursing, Vanderbilt University, Nashville, Tennessee, US

17  
18  
19  
20 **Elizabeth Hibbert** B.Physiotherapy

21 Department of Physiotherapy, Western Health, Melbourne, Victoria, Australia

22  
23  
24  
25 **Katrina Hauschildt, PhD**

26 Center for Clinical Management Research, VA Ann Arbor Healthcare System, Ann Arbor, Michigan,

27  
28  
29 US

30  
31  
32 **Rita N Bakhru** MD, MS

33 Wake Forest University School of Medicine, Department of Internal Medicine, Section of Pulmonary,

34  
35  
36  
37  
38 Critical Care, Allergy and Immunology, Winston Salem, North Carolina, US

39 **Anthony J Bastin** MBBS PhD

40 Department of Peri-operative Medicine, St Bartholomew's Hospital, Barts Health NHS Trust, London,

41  
42  
43  
44  
45 UK

46 **Brad W Butcher** MD

47 Department of Critical Care Medicine, University of Pittsburgh Medical Center, Pittsburgh, US

48  
49  
50  
51 **Tammy L Eaton** MSN, RN, FNP-BC, ACHPN

52 Department of Critical Care Medicine, University of Pittsburgh Medical Center, Pittsburgh, US

53  
54  
55  
56 **Wendy Harris**, RGN

57 University College London Hospitals NHS Foundation Trust, London, UK

58  
59 **Aluko A Hope** MD, MSCE

60

1  
2  
3 Division of Critical Care Medicine, Albert Einstein College of Medicine of Yeshiva University, New York,  
4  
5 US  
6  
7

8 **James Jackson** PsyD

9  
10 Vanderbilt University Medical Center, Tennessee, US  
11  
12

13 **Annie Johnson** APRN, ACNP-BC

14  
15 Pulmonary and Critical Care Medicine, Mayo Clinic, Rochester, Minnesota, US  
16  
17

18 **Janet A. Kloos** RN, PhD, APRN-CCNS, CCRN

19  
20 University Hospitals Cleveland Medical Center, Cleveland, Ohio, US  
21  
22

23 **Karen A Korzick** MD

24  
25 Geisinger Medical Center, Pulmonary and Critical Care Medicine, Pennsylvania, US  
26  
27

28 **Judith McCartney** MBChB, MPH

29  
30 Queen Elizabeth University Hospital, Glasgow, UK  
31  
32

33 **Joel Meyer** BM BCh DM

34  
35 Guy's & St Thomas' NHS Foundation Trust, London, UK  
36  
37

38 **Ashley Montgomery-Yates** MD

39  
40 Division of Pulmonary, Critical Care and Sleep Medicine, University of Kentucky, Kentucky, US  
41  
42

43 **Tara Quasim** MBChB, MD

44  
45 Glasgow Royal Infirmary, NHS Greater Glasgow and Clyde, Scotland, UK  
46  
47

48 **Andrew Slack**, MBBS, MRCP, EDIC, MD (Res)

49  
50 Guy's & St Thomas' NHS Foundation Trust, London, UK  
51  
52

53 **Dorothy Wade** PhD, MSc

54  
55 University College London Hospitals NHS Foundation Trust , London, UK  
56  
57

58 **Mary Still** APRN, ACNS, ANP-BS, CCRN, FCCM  
59  
60

1  
2  
3 Emory University Hospital (Emory Healthcare), Georgia, USA  
4  
5

6 **Giora Netzer MD, MSCE**

7  
8 Division of Pulmonary and Critical Care Medicine, University of Maryland School of Medicine  
9  
10 Department of Epidemiology and Public Health, University of Maryland School of Medicine,  
11 Maryland, US  
12  
13

14  
15 **Ramona O Hopkins PhD**

16 Department of Medicine, Pulmonary and Critical Care Division, Intermountain Medical Center,  
17 Murray, Utah, US  
18  
19 Center for Humanizing Critical Care, Intermountain Health Care, Murray, Utah, US  
20  
21 Psychology Department and Neuroscience Center, Brigham Young University, Provo, Utah, US  
22  
23

24  
25 **Mark E Mikkelsen MD, MSCE**

26 Division of Pulmonary, Allergy, and Critical Care Medicine, Hospital of the University of Pennsylvania,  
27 Philadelphia, US  
28  
29

30  
31  
32 **Theodore J Iwashyna MD, PhD**

33 Department of Medicine, Division of Pulmonary & Critical Care, University of Michigan, Ann Arbor,  
34 Michigan, US  
35  
36 Center for Clinical Management Research, VA Ann Arbor Healthcare System, Ann Arbor, Michigan,  
37 US  
38  
39

40  
41  
42 **Co-Senior Authors**

43 **Kimberley J. Haines PhD, BHSc (Physiotherapy)**

44 Department of Physiotherapy, Western Health

45 Department of Critical Care, Melbourne Medical School, The University of Melbourne  
46  
47  
48  
49

50 **Carla M. Sevin MD**

51 Department of Medicine, Division of Allergy, Pulmonary, and Critical Care Medicine, Vanderbilt  
52 University Medical Center, Nashville, Tennessee, US  
53  
54  
55

56  
57 On behalf of the Society of Critical Care Medicine's THRIVE Initiative

58 Word Count: 3000  
59  
60

### **Abstract**

**Purpose:** Social determinants of health (SDoH) contribute to health outcomes. We identified SDoH that were modified by critical illness, and the effect of such modifications on recovery from critical illness.

**Materials and Methods:** Patients and caregivers from three continents, took part in qualitative, in-depth semi structured interviews following hospital discharge. Interview transcripts were mapped against a pre-existing social policy framework: money and work; skills and education; housing, transport and neighbourhoods and family, friends and social connections.

**Results:** 86 interviews were analysed (66 patient and 20 caregiver). SDoH, both financial and non-financial in nature, could be negatively influenced by exposure to critical illness, with a direct impact on health-related outcomes at an individual level. Financial modifications included changes to employment status due to critical illness related disability, alongside changes to income and insurance status. Negative health impacts included the inability to access essential healthcare and an increase in mental health problems.

**Conclusions** Critical illness appears to modify SDoH for survivors and their family members, potentially impacting recovery and health. Our findings suggest that increased attention to issues such as one's social network, economic security, and access to healthcare are required following discharge from critical care.

**Keywords:** socio-economic; post intensive care syndrome; qualitative and rehabilitation.



## Article Summary

### Strengths and Limitations of the study

- This international multi-centre study utilised in-depth semi structured interviews to understand how the social determinants of health were modified by critical illness.
- Utilised replicable, rigorous qualitative methods, it suggests a complex interplay between the social determinants of health and recovery from critical illness.
- Although the sample size is considerable for a qualitative study, we recognize that we have utilised a convenience sample, with a small portion of all critical care survivors in these countries.

## Introduction

Social determinants of health (SDoH) include both upstream policy, environmental, and context factors and their manifestations in terms of individual material and social hardship(1). There has been a growing realization of their central role in shaping the capacity of individuals to not only access high quality care, but also to benefit from such care(2). In some discussions, particularly around the role of SDoH impacting outcomes from acute illness and hospitalization, such factors are conceptualized as causally antecedent to medical care and illness.

Illness can itself result in material and social hardship, opening the possibility of a bidirectional relationship(3). Financial toxicity resulting from oncologic care has been documented and is also found after surgery and respiratory failure(4, 5). Adverse employment outcomes are common after acute myocardial infarction, stroke, and critical illness(6-8). While changes in individual economic and social situations may be exacerbated by gaps in the U.S. social safety net, many have been documented throughout the industrialized world(9).

There has been little effort to systematically identify SDoH which can be worsened by specific acute health events(2). Using critical illness as an extreme case where such effects were hypothesized to be most visible if they exist, we sought to identify SDoH that were modified at the individual level by the experience of critical illness, and the effect of such modifications on patients' and families' recovery. We conducted an international qualitative study of the experience of recovery from critical illness with patients and caregivers from 14 different hospitals across Australia, the US, and the UK.

## Methods

Study design and protocol were approved by the Western Health Low Risk Human Research Ethics Panel (Australia, Ref: HREC/17/WH/170); Vanderbilt University Institutional Review Board (US coordinating site, Ref: 171299); and the Southwest (Cornwall and Plymouth, Ref: 18/SW/0137) Research Ethics Committee (UK).

### *Design and Setting*

Sites participating in the Society of Critical Care Medicine's (SCCM) THRIVE programme (10) offered Intensive Care Unit (ICU) recovery programmes in the form of post-ICU clinics and peer support programmes. Patients who had not received any specific intervention were also interviewed (**Table 1**).

Patients attending ICU recovery programmes were invited by professionals at each site if they met: i) Inclusion criteria - English-speaking patients older than 18 years admitted to the ICU, or caregiver of a patient who survived critical illness; and not ii) Exclusion criteria - ongoing severe neurological and/or cognitive impairment or continued inpatient care in hospital or rehabilitation. Informed consent was obtained before each interview.

### *Data collection*

Data were collected through in-depth semi-structured scripted interviews via telephone. Separate questions were used for caregivers and patients; these were adapted for those who did not receive a post critical illness intervention (**S1**). Questions were generated from previous literature and through iterative discussion within the research group (JMM, LB, KJH, CS). All researchers, alongside patient representatives, discussed the interview script to ensure consistency. Some interviewers were known to the participants through their role in direct clinical care. Data were audio-recorded and transcribed verbatim.

### *Data Analyses*

We sought to understand how SDoH were potentially modified at the individual level by the experience of critical illness, and the effect of such modifications on recovery. To do so, we systematically mapped our analysis against a set of pre-defined concepts related to SDoH, adapted from a public policy framework(11), including: money and work; education and skills; housing transportation and neighbourhoods; and family, friends and social connections. In this analysis, we defined a 'rural' setting as a located out with a main town or city.

The Framework Analysis technique was used to analyze data across these concepts(12) , through seven stages: 1) Transcription; 2) Familiarization with the interview; 3) Coding; 4) Developing a working analytical framework; 5) Applying the analytical framework; 6) Charting data into the framework matrix; 7) Interpreting the data(11). Three researchers (JMM, LB, JM) independently undertook preliminary sweeps of the data. Key quotes to support the findings were then independently extracted by JMM and JM. The Consolidated Reporting of Qualitative Research (COREQ) checklist was used for this study(13).

### **Patient and Public Involvement**

Patients and caregivers who had previously been admitted to intensive care helped create the interview schedules utilised for this study. They also supported the planning of the study conduct and reviewed all study documentation.

## Results

Across 14 sites, interviews were completed with 66 patients and 20 caregivers from Australia, the US, and the UK (**Table 1**). Interviews took place between July 2018 and February 2019. We analysed the data across four main domains of SDoH: money and work; education and skills; housing transportation and neighbourhoods; and family, friends and social connections. Supporting quotes, illustrating these concepts can be found in **Table 2**.

| Demographic                                      | Patients (n=66) | Caregivers (n=20) |
|--------------------------------------------------|-----------------|-------------------|
| Age (years), Median (IQR)                        | 52 (40-62.5)    | 52 (46-67)        |
| Gender, n male (%)                               | 26 (39.4)       | 3 (15)            |
| <b>Patient Admission Diagnosis n (%)</b>         |                 |                   |
| Sepsis                                           | 28 (42.4)       |                   |
| Respiratory Failure                              | 15 (22.8)       |                   |
| Post GI Surgery                                  | 5 (7.6)         |                   |
| Trauma                                           | 2 (3)           |                   |
| Other                                            | 16 (24.2)       |                   |
| <b>Ventilated, n (%)</b>                         |                 |                   |
| Yes                                              | 57 (86.4)       |                   |
| No                                               | 9 (13.6)        |                   |
| <b>Length of time since ICU discharge, n (%)</b> |                 |                   |
| <6 months                                        | 15 (22.8)       |                   |
| 7-11 months                                      | 9 (13.6)        |                   |
| 1-2 years                                        | 12 (18.2)       |                   |
| 2-5 years                                        | 22 (33.3)       |                   |
| >5 years                                         | 8 (12.1)        |                   |
| <b>Relationship to the patient, n (%)</b>        |                 |                   |
| Spouse/Significant other                         |                 | 10 (50)           |
| Parent                                           |                 | 5 (25)            |
| Sibling                                          |                 | 3 (15)            |
| Child                                            |                 | 2 (10)            |
| <b>Nationality, n (%)</b>                        |                 |                   |
| United States                                    | 50 (75.7)       | 16 (80)           |
| UK                                               | 13 (19.7)       | 2 (10)            |
| Australia                                        | 3 (4.6)         | 2 (10)            |
| <b>Participated in recovery programme, n (%)</b> |                 |                   |
| Yes                                              | 52 (79)         | 11 (55)           |
| No                                               | 14 (21)         | 9 (45)            |

**Table One: Participant Demographics**

### Money and work

Loss of both money and work following critical illness was discussed frequently across the interviews.

For example, a patient from Australia described how their new critical illness disability had changed their employment status:

*'I come home and now you've lost your job and you can't work and then the realisation that you are on oxygen for the rest of your life.'*

Job loss and change had a direct negative impact on income, access to care and subsequent recovery from critical illness. For example, one patient of the loss of not only insurance but also savings during critical illness and the recovery period following forced unemployment:

*'For the first surgery I had two insurances.. second surgery, my school, they were nice enough to keep me on there, but then I lost it because I wasn't working.... We had a little savings, but that's all gone, because we have had to use it for medical bills and driving to the hospital an hour and a half.'*

There were health-related consequences of the changes. For example, participants described how they could no longer afford the treatments necessary for recovery:

| Social Determinant of Health Modification         | Illustrative Quote                                                                                                                                                                                                                                                                                                                                                                                                                                                                                                                                                                                                                                                                                                                                                                                                                                                                                                                                                                                                                                                                                                                                                                                                                                                                                                                                                                                                                                                                                                                                                                                                                                                                                                                                                                                  |
|---------------------------------------------------|-----------------------------------------------------------------------------------------------------------------------------------------------------------------------------------------------------------------------------------------------------------------------------------------------------------------------------------------------------------------------------------------------------------------------------------------------------------------------------------------------------------------------------------------------------------------------------------------------------------------------------------------------------------------------------------------------------------------------------------------------------------------------------------------------------------------------------------------------------------------------------------------------------------------------------------------------------------------------------------------------------------------------------------------------------------------------------------------------------------------------------------------------------------------------------------------------------------------------------------------------------------------------------------------------------------------------------------------------------------------------------------------------------------------------------------------------------------------------------------------------------------------------------------------------------------------------------------------------------------------------------------------------------------------------------------------------------------------------------------------------------------------------------------------------------|
| <b>Family, Friends and Social Connections</b>     | <p>'I went back to my daughters and I stayed there for a while. I relaxed and um I did relax...I had my grandchildren around me who I think are one of the best healer's um because just being with them makes me feel erm good...'</p> <p>'God has helped me through the ministry...for 50 years we were pastors. Knowing and seeing how he has worked with other people in their lives, I think has given me the experiences to know that' hey you don't have to do this by yourself'.</p> <p>'Our friends all disappeared. ...I'm not who I was before. I think that, for most people, they couldn't deal with it. And so our community just sort of vanished.</p> <p>"I would feel better and I wouldn't feel so alone with all of this. Because while my family was supportive, they reached a point where they didn't want to talk about it. They didn't want to relive it."</p>                                                                                                                                                                                                                                                                                                                                                                                                                                                                                                                                                                                                                                                                                                                                                                                                                                                                                                              |
| <b>Money and Work</b>                             | <p>'Financially...for the first surgery I had two insurances, mine and my husband. Second surgery, my school, they were nice enough to keep me on there, but then I lost it, because I wasn't working. Financially, if its less than a year you've got deductibles. There's no plan that helps people that are working...if we were very, very poor, or very, very rich, but there's nothing that helps you in the middle. There isn't.... We had a little bit of savings, but that's all gone, because we've had to use it medical bills, and driving to the hospital an hour and a half.'</p> <p>'Whether you know when he came home, whether the house had to be reconfigured for a wheelchair or anything like that- that was another challenge not knowing as well, financial circumstances that's another challenge you know- he's out of work he was a breadwinner and now he's not sort of thing and who do we rely, what do we do, and everything like that- that's a big issue I think with everyone who is sick I suppose. '</p> <p>'I would say being able to get back into the field of work and build relationships and actually function....I just felt worthless, because without your money...We associate money with the ability to educate or be educated. There's no secret'.</p> <p>'I think it's changing the paradigm from thinking that ICU is the endpoint...with medicine the way it is, it isn't the next step to the funeral home necessarily...these people are surviving. They're not perishing.... it's affected every aspect of a person's family life. And often it's affecting their money. And things that are big, that are really going to impact them, and I don't think people realize. I think there just needs to be a better support system in place.</p> |
| <b>Skills and Education</b>                       | <p>'I was fully able to read small things in neurological journals. My husbands a physician, so I would take whatever passwords he had to things so I could get to the journals that normally lay pay can't get into them.'</p> <p>'I think that the other thing that's helped us do well is just some of the personal tools we have. We're not ashamed to ask or accept help, or to ask a question, or to be kind of vulnerable... some of that has to do with our education, like we're both very resourceful.... I can see if you've maybe poorly educated, I can see if you lived in a world where people haven't been trustworthy, so you don't trust people, I can see if we had different life experience, it could just look a lot differently.'</p>                                                                                                                                                                                                                                                                                                                                                                                                                                                                                                                                                                                                                                                                                                                                                                                                                                                                                                                                                                                                                                        |
| <b>Housing, Transportation and Neighbourhoods</b> | <p>'What I did, when I got back home, the only place I could sleep for a while was the recliner. I could not lay down on our bed.'</p> <p>'Now our hospital in (geographical area name) its good for a band-aid. If you have anything else wrong with you, you do not want to go there.'</p> <p>'I wanted to give back..... it would be easy for me not to go, because it's a long distance and its kind of a hassle to get up there.'</p>                                                                                                                                                                                                                                                                                                                                                                                                                                                                                                                                                                                                                                                                                                                                                                                                                                                                                                                                                                                                                                                                                                                                                                                                                                                                                                                                                          |

Table 2: Modification of the SDoH at the individual level and potential effects of such modifications on recovery from critical illness

1  
2  
3 *'my insurance company is messing with me right now... I'm out of my medicine. I'm out of one of them.*  
4  
5 *I called to see how much it was and I can't afford that. They want \$55 for seven days. I can't afford*  
6  
7 *that.'*  
8  
9

10  
11  
12 Participants discussed how these changes to money and work were a direct mechanism for mental  
13  
14 health problems. One participant from the US spoke about how changes to her health insurance had  
15  
16 increased feelings of anxiety:  
17

18  
19  
20  
21 *'There was an issue with the insurance....the first time said they weren't going to cover any of our*  
22  
23 *hospital bills. You can imagine... 'We're going to lose our house, oh my God...' The anxiety of it all. ....'*  
24

25  
26  
27  
28 A participant from the UK discussed changes to her employment situation following critical illness  
29  
30 and subsequent emotional disruption:  
31

32  
33  
34 *'I've changed jobs, I was a teacher before, but now I've gone into office work and I'm still trying to*  
35  
36 *adjust. My GP wrote a letter saying I wasn't fit to go back to teaching because of the kind of asthma*  
37  
38 *I've got...At the time I was devastated, I was really, really devastated.'*  
39  
40  
41

42  
43  
44 Caregivers suffered similar loss of money and work, albeit via different mechanisms. One participant  
45  
46 (patient) spoke about how their partner had lost their job due to new/increased caregiving  
47  
48 responsibilities following hospital discharge:  
49

50  
51  
52 *'I was working when I went in, and so was she and she had to take time off from work, and they had*  
53  
54 *let her go from work, after she wasn't making her units, and it made it rough on us.'*  
55  
56  
57  
58  
59  
60



### Skills and Education

The increased disability caused by critical illness resulted in an inability to return previous roles and activities. One participant, who had a highly skilled role, described the impact of cognitive disability on function:

*'My brain's just not making the connection...I'm retired but I was a judge and for a long time I wouldn't go back to court.... I can tell my brain is not making the connection.'*

Similarly, a participant who had been in a skilled academic role could no longer return to their previous appointment, because of critical illness-caused cognitive decline:

*'My identity was a writer and professor had been built around being smart and so those issues manifested themselves as word finding, executive functioning...I couldn't go back to work though. I was having cognitive difficulties...my request to have support for my particular cognitive deficits has been denied.'*

Such loss of skills required survivors to re-evaluate future career and employment prospects. One younger participant spoke of having to change educational pathways:

*'it's changed my career path. I'm only 20...I just turned 21. And so I'm still really young. I'm in college. I changed my major because of it.'*

### Housing, Transportation, and Neighbourhoods

New critical illness related disability significantly disrupted housing, transportation and residency in those survivors interviewed. Patients needed to move house due to physical inability:

1  
2  
3 *"It took, again, a lot of coordination and a lot of....Everyone pitched in...but it did provide a lot of stress,*  
4 *just in managing food and managing cleaning, and all the little things that you have to do from day to*  
5 *day. One of the reasons we began looking to move...having such a large house was a big struggle for*  
6 *her. Even going up and down stairs."*  
7  
8  
9  
10  
11  
12  
13

14 A participant from Australia spoke about the challenges to find funding for the housing adaptations  
15 which were required following critical illness and the financial and emotional stress this caused:  
16  
17

18  
19  
20  
21 *'when he came home whether the house had to be reconfigured for a wheelchair or anything like*  
22 *that...the financial circumstances that's another challenge... he was a breadwinner and now he's not*  
23 *and who de we rely, what do we do?'*  
24  
25  
26  
27  
28  
29

30 The burden of transportation rose for survivors, who now needed to attend more medical  
31 appointments. Yet many critical illness survivors could no longer drive, so this ongoing health burden  
32 caused disruption for the entire family unit:  
33  
34  
35

36  
37  
38  
39 *'It wasn't necessarily one doctor's appointment that stood out, but it was the fact that there were so*  
40 *many of them, and I think it was so significant because we had to drive an hour each way to get there.'*  
41  
42  
43  
44  
45

46 These changes influenced recovery for many, especially for those living in rural areas, as accessing  
47 appropriate and reliable healthcare became harder:  
48  
49

50  
51 *'I mean around here you're not going to find any medical help that's going to be decent. We're just*  
52 *so far removed from everything....quite a disadvantage of being so far away from everything.'*  
53  
54  
55  
56  
57  
58  
59  
60

1  
2  
3 Changes to how participants could access transport also had a direct impact on recovery. For example,  
4  
5 one participant spoke about how their inability to drive led to feelings of isolation:  
6  
7  
8  
9

10 *'I couldn't drive for quite a long time, so I felt fairly dependent, I felt pretty trapped in.'*  
11  
12  
13

#### 14 **Family, Friends and Social connections**

15  
16 Critical illness changed survivors' social networks and relationships within families. For example,  
17  
18 participants spoke about the negative impact of physical and emotional changes on wider social  
19  
20 networks:  
21  
22  
23  
24

25 *'and so our community sort of vanished... I still have these huge scars and I'm not who I was before. I*  
26  
27 *think for most people, they couldn't deal with it.'*  
28  
29  
30  
31

32 Critical illness also led to fractures in family networks. In some cases, families struggled to manage the  
33  
34 enormity of the situation, which led to challenges during recovery. For example, one survivor from  
35  
36 the UK highlighted the impact which it had on the family unit:  
37  
38  
39  
40

41 *'I was doing something in the kitchen, and I couldn't do it and I ended up smashing stuff all over the*  
42  
43 *kitchen and my brother came in and I started shouting at him, saying you know this is my life?'*  
44  
45  
46  
47

48 These changes had consequences during recovery. Participants described isolation, challenges re-  
49  
50 engaging with activities of daily living, and mental health problems related to these changes. A  
51  
52 participant from the US described how these changes had impacted their mental health and  
53  
54 behaviour:  
55  
56  
57  
58  
59  
60

1  
2  
3 *'No one talked to me about how I might be when I get home, like emotionally...I react to things... I feel*  
4 *bad 'cause its like hell for my family. I have these... I can't control them...just absolute fits of anger and*  
5 *rage... and just crying.'*  
6  
7  
8  
9  
10  
11  
12  
13  
14  
15  
16  
17  
18  
19  
20  
21  
22  
23  
24  
25  
26  
27  
28  
29  
30  
31  
32  
33  
34  
35  
36  
37  
38  
39  
40  
41  
42  
43  
44  
45  
46  
47  
48  
49  
50  
51  
52  
53  
54  
55  
56  
57  
58  
59  
60

For peer review only

## Discussion

This international, multi-centre study suggests a complex interplay between SDoH and recovery from critical illness. It is already well-established that upstream policy and contextual factors, as well as individual hardship, are associated with worsened onset of critical illness and outcomes; the early months of the COVID-19 epidemic particularly highlighted this(14). These qualitative results demonstrate how critical illness precipitated adverse changes in the recovery environment. These changes and other behavior changes resulted in lost connections with family and social support, loss of the instrumental, social, and psychological benefits of work, and having numerous other practical difficulties. Together these changes impeded successful access to and benefit from even traditional health services. Our findings provide evidence that the relationship between social determinants and recovery plays out across multiple domains of SDoH and recovery, as well as bi-directionally. Further, they demonstrate that the “social determinants of recovery” are not fixed nor the same as patients’ pre-illness statuses, suggesting a need to assess these mechanisms, and their impact, across time.

These findings can be situated in a broader body of work that suggests their generalizability. Inadequacies of the U.S. health and social safety net are well-described, but it is notable that the data for this study also included examples from Australia and the United Kingdom. Loss of employment and/or financial hardship after AMI, acute respiratory distress syndrome, or traumatic injury are not uncommon(6, 15, 16). Studies have likewise found many suffer from significant financial costs and related material hardship due to chronic and ongoing illness, such as cancer(17) and heart disease(18).

Some, but not all, of the difficulties here seem to be a failure of the insurance functions of existing organizational arrangements to buffer patients and their families against purely financial shocks of critical illness. This interpretation is reinforced by findings that specifically financial stress is central after acute respiratory failure(5), as well as work on surprise billing(19) and risk for high bills after surgery(20), or decades-old findings about patients self-management of diabetes in the presence of

1  
2  
3 cost concerns(21). Additionally, substantial evidence supports our findings that critical illness leads to  
4 other financial hardship through job loss, unpaid family caregiving, and new nonmedical expenses due  
5 to new disability(4, 7, 22). Moreover, recent data from the UK suggest that patients who have ongoing  
6 disability due to critical illness, are more likely to require government funded welfare support in the  
7 years following discharge, in comparison to contemporary hospital controls(23); concerns are  
8 emerging about COVID-19 patients(24, 25).  
9

10  
11  
12 Efforts to address these resulting financial hardships through direct payments to patients and  
13 caregivers have shown promise; the Medicaid Cash and Counseling program found improved patient  
14 and caregiver wellbeing alongside improved health outcomes(26, 27). Similarly, the US Department  
15 of Veteran Affairs' Program of Comprehensive Assistance to Family Caregivers suggests financial  
16 support provides crucial assistance in varied ways, depending on specific needs(28). In the UK, efforts  
17 to include social welfare consultation as part of critical illness recovery programs have also shown  
18 promise(29). These issues may become more prominent as moves to telehealth and remote  
19 monitoring require patients to bring more of their own technology to fully access services, potentially  
20 exacerbating inequities(30, 31).  
21  
22  
23  
24  
25  
26  
27  
28  
29  
30  
31  
32  
33  
34  
35  
36  
37  
38  
39  
40

41 Other challenges do not appear to be purely financial and would not be remediated by even  
42 theoretically complete insurance against total healthcare costs. Particularly prominent are the  
43 impacts of critical illness on social isolation. Social isolation is not benign; the influence of social  
44 relationships and social isolation on mortality is comparable to smoking, obesity and alcohol(32).  
45 initiatives across the UK and the US have successfully introduced innovation to support social isolation.  
46 For example, in Chicago, one health system added a social connection question to a pre-existing health  
47 screening tool, alongside care pathways such a friendly caller initiative to promote community  
48 socialisation during the COVID-19 pandemic(33). Peer support programmes which link individuals  
49 who have had similar healthcare experiences may also be advantageous, with evidence suggesting  
50  
51  
52  
53  
54  
55  
56  
57  
58  
59  
60

1  
2  
3 peer support could be a mechanism for reducing social isolation and improving global mental  
4  
5 health(34).  
6  
7  
8  
9

10 These data in the context of emerging literature have implications for clinicians and health systems  
11 seeking to promote full recovery of critically ill and other patients by addressing SDoH(35, 36). First,  
12 the data suggest that assessments of risk might include not just current hardship, but the extent to  
13 which the patients' reserves (broadly construed) are sufficient to prevent future hardship. It is unclear  
14 to what extent currently suggested patient-level risk assessments of SDoH(37, 38) are capable of  
15 predicting changes of the type these patients described. Second, given the myriad ways in which SDoH  
16 impacted each other following critical illness, understanding the impact of post-illness interventions  
17 (or lack thereof) must also be scrutinized across multiple domains, understanding that positive and  
18 negative consequences may be different for each patient. Certainly, targeted interventions to assure  
19 access to follow-up care, such as transportation support (e.g., Uber or Lyft vouchers) or telehealth  
20 support (e.g., device provision and training) can address some impacts. However, the multi-faceted  
21 and interactive results of our study also suggest that broader programs of direct assistance after  
22 critical illness, which address financial and non-financial resources, should be explored and potentially  
23 advocated for.  
24  
25  
26  
27  
28  
29  
30  
31  
32  
33  
34  
35  
36  
37  
38  
39  
40  
41  
42  
43

#### 44 *Limitations*

45 Strengths of this study include its international, multicenter approach to understanding the interplay  
46 between SDoH and recovery from critical illness. However, although the sample size is considerable  
47 for a qualitative study, we recognize that we have utilised a convenience sample, with a small portion  
48 of all critical care survivors in these countries. We acknowledge that the primary aim of these  
49 interviews was not to delineate the socio-economic problems which participants faced during  
50 recovery from critical illness. As such, important concepts may have been missed in this analysis. For  
51 example, we did not find cross-country differences; this is an important construct which could have  
52  
53  
54  
55  
56  
57  
58  
59  
60

1  
2  
3 been missed. Finally, we have used a broad definition of the term 'rural' in this analysis to ensure that  
4  
5 it is applicable internationally. However, there are international variances in rural and urban  
6  
7 interfaces, as such we may be under or over reporting this as an issue.  
8  
9

## 10 11 12 **Conclusion**

13  
14 In conclusion, this international, multi-center study has explored how critical illness changes social  
15  
16 circumstances, impacting recovery and health. Our findings suggest that increased attention to issues  
17  
18 such as one's social network, economic security, education and skills, access to healthcare, and living  
19  
20 environment are required following critical care discharge. Targeting interventions toward these  
21  
22 domains, could potentially improve outcomes.  
23  
24  
25  
26  
27  
28  
29  
30  
31  
32  
33  
34  
35  
36  
37  
38  
39  
40  
41  
42  
43  
44  
45  
46  
47  
48  
49  
50  
51  
52  
53  
54  
55  
56  
57  
58  
59  
60



**Ethics and consent to participate:**

The study design and protocol were approved by the Western Health Low Risk Human Research Ethics Panel (Australia, Ref: HREC/17/WH/170); the Vanderbilt University Institutional Review Board (US coordinating site, Ref: 171299); and the Southwest (Cornwall and Plymouth, Ref: 18/SW/0137) Research Ethics Committee (UK). All participants provided informed consent.

**Consent for publication:**

N/A

**Availability of data:**

The dataset used is available on reasonable request from the corresponding author.

**Competing Interests:**

No conflicts of interest declared by other authors.

**Sources of Funding:** K Haines, J McPeake, L Boehm, C Sevin and Tara Quasim received funding from SCCM to undertake this work (NO AWARD NUMBER). L Boehm is funded by NIH/NHLBI (K12 HL137943) as is T J Iwashyna (K12 HL138039). J McPeake is funded by a THIS.Institute (University of Cambridge) Fellowship (PD- 2019-02-16/307748-01).

**Author Contribution:**

Conception and design: JM, CS, KH, TJI, MM

Data Extraction and Primary Analysis: JM, KH, CS, TJI and LB

Analysis and interpretation: LB, JM, TJI

Drafting and revising the manuscript for important intellectual content: ALL.

**Role of the funder:** This analysis was funded by the Society of Critical Care Medicine (SCCM). The scientific questions, analytic framework, data collection, and analysis were undertaken independently of the funder. The SCCM Council reviewed the manuscript and offered input prior to finalization.

**Acknowledgements:** The authors would like to acknowledge the funders for their support.

**Figure and Table Legends:**

Table One: Participant Demographics

Table 2: Modification of SDoH at the individual level and potential effects of such modifications on recovery from critical illness.

## References

1. Byhoff E, Kangovi S, Berkowitz SA, DeCamp M, Dzung E, Earnest M, et al. A Society of General Internal Medicine Position Statement on the Internists' Role in Social Determinants of Health. *Journal of General Internal Medicine*. 2020;35(9):2721-7.
2. Butler SM. What is the Outlook for Addressing Social Determinants of Health? *JAMA Health Forum*. 2021;2(9):e213639-e.
3. Mendes de Leon CF, Griggs JJ. Medical Debt as a Social Determinant of Health. *JAMA*. 2021;326(3):228-9.
4. Hauschildt KE, Seigworth C, Kamphuis LA, Hough CL, Moss M, McPeake JM, et al. Financial Toxicity After Acute Respiratory Distress Syndrome: A National Qualitative Cohort Study. *Crit Care Med*. 2020;48(8):1103-10.
5. Khandelwal N, Hough CL, Downey L, Engelberg RA, Carson SS, White DB, et al. Prevalence, Risk Factors, and Outcomes of Financial Stress in Survivors of Critical Illness. *Crit Care Med*. 2018;46(6):e530-e9.
6. Kamdar BB, Huang M, Dinglas VD, Colantuoni E, Wachter TMv, Hopkins RO, et al. Joblessness and Lost Earnings after Acute Respiratory Distress Syndrome in a 1-Year National Multicenter Study. *Am J Respir Crit Care Med*. 2017;196(8):1012-20.
7. McPeake J, Mikkelsen ME, Quasim T, Hibbert E, Cannon P, Shaw M, et al. Return to Employment after Critical Illness and Its Association with Psychosocial Outcomes. A Systematic Review and Meta-Analysis. *Ann Am Thorac Soc*. 2019;16(10):1304-11.
8. Garland A, Jeon S-H, Stepner M, Rotermann M, Fransoo R, Wunsch H, et al. Effects of cardiovascular and cerebrovascular health events on work and earnings: a population-based retrospective cohort study. *Canadian Medical Association Journal*. 2019;191(1):E3-E10.
9. Paul C, Boyes A, Hall A, Bisquera A, Miller A, O'Brien L. The impact of cancer diagnosis and treatment on employment, income, treatment decisions and financial assistance and their relationship to socioeconomic and disease factors. *Supportive Care in Cancer*. 2016;24(11):4739-46.
10. McPeake J, Hirshberg EL, Christie LM, Drumright K, Haines K, Hough CL, et al. Models of Peer Support to Remediate Post-Intensive Care Syndrome: A Report Developed by the Society of Critical Care Medicine Thrive International Peer Support Collaborative. *Crit Care Med*. 2019;47(1):e21-e7.
11. Dodds S. Ten years of the Glasgow Centre for population Health: the evidence and implications. In: Health GCfP, editor. *Glasgow 2014*
12. Gale NK, Heath G, Cameron E, Rashid S, Redwood S. Using the framework method for the analysis of qualitative data in multi-disciplinary health research. *BMC Medical Research Methodology*. 2013;13(1):117.
13. Tong A, Sainsbury P, Craig J. Consolidated criteria for reporting qualitative research (COREQ): a 32-item checklist for interviews and focus groups. *International Journal for Quality in Health Care*. 2007;19(6):349-57.
14. Lone NI, McPeake J, Stewart NI, Blayney MC, Seem RC, Donaldson L, et al. Influence of socioeconomic deprivation on interventions and outcomes for patients admitted with COVID-19 to critical care units in Scotland: A national cohort study. *The Lancet Regional Health – Europe*. 2021;1.
15. Warraich HJ, Kaltenbach LA, Fonarow GC, Peterson ED, Wang TY. Adverse Change in Employment Status After Acute Myocardial Infarction. *Circulation: Cardiovascular Quality and Outcomes*. 2018;11(6):e004528.
16. Murphy PB, Severance S, Savage S, Obeng-Gyasi S, Timsina LR, Zarzaur BL. Financial toxicity is associated with worse physical and emotional long-term outcomes after traumatic injury. *Journal of Trauma and Acute Care Surgery*. 2019;87(5):1189-96.
17. Zafar SY, Peppercorn JM, Schrag D, Taylor DH, Goetzinger AM, Zhong X, et al. The financial toxicity of cancer treatment: a pilot study assessing out-of-pocket expenses and the insured cancer patient's experience. *Oncologist*. 2013;18(4):381-90.

18. Valero-Elizondo J, Khera R, Saxena A, Grandhi GR, Virani SS, Butler J, et al. Financial Hardship From Medical Bills Among Nonelderly U.S. Adults With Atherosclerotic Cardiovascular Disease. *Journal of the American College of Cardiology*. 2019;73(6):727-32.
19. Chhabra KR, Sheetz KH, Nuliyalu U, Dekhne MS, Ryan AM, Dimick JB. Out-of-Network Bills for Privately Insured Patients Undergoing Elective Surgery With In-Network Primary Surgeons and Facilities. *JAMA*. 2020;323(6):538-47.
20. Scott JW, Raykar NP, Rose JA, Tsai TC, Zogg CK, Haider AH, et al. Cured into Destitution: Catastrophic Health Expenditure Risk Among Uninsured Trauma Patients in the United States. *Ann Surg*. 2018;267(6):1093-9.
21. Piette JD, Heisler M, Wagner TH. Cost-related medication underuse among chronically ill adults: the treatments people forgo, how often, and who is at risk. *Am J Public Health*. 2004;94(10):1782-7.
22. Griffiths J, Hatch RA, Bishop J, Morgan K, Jenkinson C, Cuthbertson BH, et al. An exploration of social and economic outcome and associated health-related quality of life after critical illness in general intensive care unit survivors: a 12-month follow-up study. *Crit Care*. 2013;17(3):R100.
23. McPeake J, Iwashyna TJ, Henderson P, Leyland AH, Mackay D, Quasim T, et al. Long term outcomes following critical care hospital admission: A prospective cohort study of UK biobank participants. *The Lancet Regional Health – Europe*. 2021;6.
24. Donnelly JP, Wang XQ, Iwashyna TJ, Prescott HC. Readmission and Death After Initial Hospital Discharge Among Patients With COVID-19 in a Large Multihospital System. *JAMA*. 2021;325(3):304-6.
25. Iwashyna TJ, Kamphuis LA, Gundel SJ, Hope AA, Jolley S, Admon AJ, et al. Continuing Cardiopulmonary Symptoms, Disability, and Financial Toxicity 1 Month After Hospitalization for Third-Wave COVID-19: Early Results From a US Nationwide Cohort. *J Hosp Med*. 2021.
26. Carlson BL, Foster L, Dale SB, Brown R. Effects of Cash and Counseling on personal care and well-being. *Health Serv Res*. 2007;42(1 Pt 2):467-87.
27. Coe NB, Guo J, Konetzka RT, Van Houtven CH. What is the marginal benefit of payment-induced family care? Impact on Medicaid spending and health of care recipients. *Health Econ*. 2019;28(5):678-92.
28. Sperber Nea. Family caregiver use and value of support services in the VA Program of Comprehensive Assistance for Family Caregivers. *Journal of long-term care* 2018 41-50.
29. McPeake JM, Henderson P, Darroch G, Iwashyna TJ, MacTavish P, Robinson C, et al. Social and economic problems of ICU survivors identified by a structured social welfare consultation. *Crit Care*. 2019;23(1):153.
30. VanderBeek BL. Telemedicine and the Exacerbation of Health Care Disparities. *JAMA Ophthalmology*. 2021.
31. Lyles CR, Wachter RM, Sarkar U. Focusing on Digital Health Equity. *JAMA*. 2021.
32. Holt-Lunstad J, Smith TB, Baker M, Harris T, Stephenson D. Loneliness and social isolation as risk factors for mortality: a meta-analytic review. *Perspect Psychol Sci*. 2015;10(2):227-37.
33. Escalante E, Golden RL, Mason DJ. Social Isolation and Loneliness: Imperatives for Health Care in a Post-COVID World. *JAMA*. 2021;325(6):520-1.
34. McPeake J, Iwashyna TJ, Boehm LM, Hibbert E, Bakhru RN, Bastin AJ, et al. Benefits of Peer Support for Intensive Care Unit Survivors: Sharing Experiences, Care Debriefing, and Altruism. *American Journal of Critical Care*. 2021;30(2):145-9.
35. Falvey JR, Murphy TE, Leo-Summers L, Gill TM, Ferrante LE. Neighborhood Socioeconomic Disadvantage and Disability After Critical Illness. *Crit Care Med*. 9000.
36. Bastian K, Hollinger A, Mebazaa A, Azoulay E, Féliot E, Chevreur K, et al. Association of social deprivation with 1-year outcome of ICU survivors: results from the FROG-ICU study. *Intensive Care Med*. 2018;44(12):2025-37.

- 1  
2  
3 37. Moscrop A, Ziebland S, Bloch G, Iraola JR. If social determinants of health are so important,  
4 shouldn't we ask patients about them? BMJ. 2020;371:m4150.  
5  
6 38. A Review of Tools to Screen for Social Determinants of Health in the United States: A Practice  
7 Brief. Population Health Management. 2020;23(6):422-9.  
8  
9  
10  
11  
12  
13  
14  
15  
16  
17  
18  
19  
20  
21  
22  
23  
24  
25  
26  
27  
28  
29  
30  
31  
32  
33  
34  
35  
36  
37  
38  
39  
40  
41  
42  
43  
44  
45  
46  
47  
48  
49  
50  
51  
52  
53  
54  
55  
56  
57  
58  
59  
60

For peer review only

1  
2  
3  
4  
5  
6  
7  
8  
9  
10  
11  
12  
13  
14  
15  
16  
17  
18  
19  
20  
21  
22  
23  
24  
25  
26  
27  
28  
29  
30  
31  
32  
33  
34  
35  
36  
37  
38  
39  
40  
41  
42  
43  
44  
45  
46  
47  
48  
49  
50  
51  
52  
53  
54  
55  
56  
57  
58  
59  
60

For peer review only

1  
2  
3  
4  
5  
6  
7  
8  
9  
10  
11  
12  
13  
14  
15  
16  
17  
18  
19  
20  
21  
22  
23  
24  
25  
26  
27  
28  
29  
30  
31  
32  
33  
34  
35  
36  
37  
38  
39  
40  
41  
42  
43  
44  
45  
46  
47  
48  
49  
50  
51  
52  
53  
54  
55  
56  
57  
58  
59  
60

For peer review only

### **Supplemental File 1: Patient Interview Schedule**

1. Can you tell me about the how you have been getting on since you left hospital?
2. Thinking back to what you recall of your time in ICU, and then walking through your recovery from hospital to home to now – what were the most important moments for you? What stands out the most to you?
3. Thinking about this time from ICU to home, what were some of the challenges you encountered along the way?
4. How did you try and solve some of these challenges?
5. Can you describe any successful parts of your recovery?
6. Thinking about your involvement in the ICU recovery programme, how did you feel when you received the invitation to take part?
7. What motivated you to participate? Why do you think you were able to participate at the time you did?
8. How did you feel when you first went to the program? Did that experience change over time?
9. How has the programme influenced your recovery?
10. Has anyone commented on changes which they have seen in you, if so what have they said?
11. What do you think are the most important parts of a support programme?
12. How could we better support patients and their families following discharge from ICU?
13. If another patient was thinking about participating in such a programme, what would you say to them?
14. Is there anything else you would like to add or ask?

### **Informal Caregiver Interview Schedule**

1. Can you tell me about how you have been getting on since your loved one left hospital?
2. Thinking back to what you remember about being in the ICU, and then the recovery period through to now – what were the most important moments for you? What stands out the most to you?
3. Thinking about this time, what were some of the challenges you encountered along the way?
4. How did you try and solve some of these challenges?
5. What were some of your greatest successes as your provided support to your loved one?
6. Thinking about your involvement in the program (quote relevant program), how did you feel when you received the invitation to join this program?
7. What motivated you to participate? What made it possible for you to participate when you did?

1  
2  
3 8. How did you feel when you first went to the program? How did that experience change over time?  
4

5 9. How has the program influenced your experience as a caregiver following ICU?  
6

7 10. What do you think are the most important parts of a support program from ICU discharge to post-  
8 hospital?  
9

10 11. How could we better support patients and their caregivers following discharge from ICU? 12. Can  
11 you describe what you think would help people cope better with recovery after being in ICU?  
12

13 13. Is there anything else you would like to add or ask?  
14  
15  
16  
17  
18  
19  
20  
21  
22  
23  
24  
25  
26  
27  
28  
29  
30  
31  
32  
33  
34  
35  
36  
37  
38  
39  
40  
41  
42  
43  
44  
45  
46  
47  
48  
49  
50  
51  
52  
53  
54  
55  
56  
57  
58  
59  
60



## COREQ (COnsolidated criteria for REporting Qualitative research) Checklist

A checklist of items that should be included in reports of qualitative research. You must report the page number in your manuscript where you consider each of the items listed in this checklist. If you have not included this information, either revise your manuscript accordingly before submitting or note N/A.

| Topic                                          | Item No. | Guide Questions/Description                                                                                                                              | Reported on Page No. |
|------------------------------------------------|----------|----------------------------------------------------------------------------------------------------------------------------------------------------------|----------------------|
| <b>Domain 1: Research team and reflexivity</b> |          |                                                                                                                                                          |                      |
| <i>Personal characteristics</i>                |          |                                                                                                                                                          |                      |
| Interviewer/facilitator                        | 1        | Which author/s conducted the interview or focus group?                                                                                                   |                      |
| Credentials                                    | 2        | What were the researcher's credentials? E.g. PhD, MD                                                                                                     |                      |
| Occupation                                     | 3        | What was their occupation at the time of the study?                                                                                                      |                      |
| Gender                                         | 4        | Was the researcher male or female?                                                                                                                       |                      |
| Experience and training                        | 5        | What experience or training did the researcher have?                                                                                                     |                      |
| <i>Relationship with participants</i>          |          |                                                                                                                                                          |                      |
| Relationship established                       | 6        | Was a relationship established prior to study commencement?                                                                                              |                      |
| Participant knowledge of the interviewer       | 7        | What did the participants know about the researcher? e.g. personal goals, reasons for doing the research                                                 |                      |
| Interviewer characteristics                    | 8        | What characteristics were reported about the interviewer/facilitator? e.g. Bias, assumptions, reasons and interests in the research topic                |                      |
| <b>Domain 2: Study design</b>                  |          |                                                                                                                                                          |                      |
| <i>Theoretical framework</i>                   |          |                                                                                                                                                          |                      |
| Methodological orientation and Theory          | 9        | What methodological orientation was stated to underpin the study? e.g. grounded theory, discourse analysis, ethnography, phenomenology, content analysis |                      |
| <i>Participant selection</i>                   |          |                                                                                                                                                          |                      |
| Sampling                                       | 10       | How were participants selected? e.g. purposive, convenience, consecutive, snowball                                                                       |                      |
| Method of approach                             | 11       | How were participants approached? e.g. face-to-face, telephone, mail, email                                                                              |                      |
| Sample size                                    | 12       | How many participants were in the study?                                                                                                                 |                      |
| Non-participation                              | 13       | How many people refused to participate or dropped out? Reasons?                                                                                          |                      |
| <i>Setting</i>                                 |          |                                                                                                                                                          |                      |
| Setting of data collection                     | 14       | Where was the data collected? e.g. home, clinic, workplace                                                                                               |                      |
| Presence of non-participants                   | 15       | Was anyone else present besides the participants and researchers?                                                                                        |                      |
| Description of sample                          | 16       | What are the important characteristics of the sample? e.g. demographic data, date                                                                        |                      |
| <i>Data collection</i>                         |          |                                                                                                                                                          |                      |
| Interview guide                                | 17       | Were questions, prompts, guides provided by the authors? Was it pilot tested?                                                                            |                      |
| Repeat interviews                              | 18       | Were repeat interviews carried out? If yes, how many?                                                                                                    |                      |
| Audio/visual recording                         | 19       | Did the research use audio or visual recording to collect the data?                                                                                      |                      |
| Field notes                                    | 20       | Were field notes made during and/or after the interview or focus group?                                                                                  |                      |
| Duration                                       | 21       | What was the duration of the interviews or focus group?                                                                                                  |                      |
| Data saturation                                | 22       | Was data saturation discussed?                                                                                                                           |                      |
| Transcripts returned                           | 23       | Were transcripts returned to participants for comment and/or                                                                                             |                      |

| Topic                                  | Item No. | Guide Questions/Description                                                                                                        | Reported on Page No. |
|----------------------------------------|----------|------------------------------------------------------------------------------------------------------------------------------------|----------------------|
|                                        |          | correction?                                                                                                                        |                      |
| <b>Domain 3: analysis and findings</b> |          |                                                                                                                                    |                      |
| <i>Data analysis</i>                   |          |                                                                                                                                    |                      |
| Number of data coders                  | 24       | How many data coders coded the data?                                                                                               |                      |
| Description of the coding tree         | 25       | Did authors provide a description of the coding tree?                                                                              |                      |
| Derivation of themes                   | 26       | Were themes identified in advance or derived from the data?                                                                        |                      |
| Software                               | 27       | What software, if applicable, was used to manage the data?                                                                         |                      |
| Participant checking                   | 28       | Did participants provide feedback on the findings?                                                                                 |                      |
| <i>Reporting</i>                       |          |                                                                                                                                    |                      |
| Quotations presented                   | 29       | Were participant quotations presented to illustrate the themes/findings?<br>Was each quotation identified? e.g. participant number |                      |
| Data and findings consistent           | 30       | Was there consistency between the data presented and the findings?                                                                 |                      |
| Clarity of major themes                | 31       | Were major themes clearly presented in the findings?                                                                               |                      |
| Clarity of minor themes                | 32       | Is there a description of diverse cases or discussion of minor themes?                                                             |                      |

Developed from: Tong A, Sainsbury P, Craig J. Consolidated criteria for reporting qualitative research (COREQ): a 32-item checklist for interviews and focus groups. *International Journal for Quality in Health Care*. 2007. Volume 19, Number 6: pp. 349 – 357

**Once you have completed this checklist, please save a copy and upload it as part of your submission. DO NOT include this checklist as part of the main manuscript document. It must be uploaded as a separate file.**

# BMJ Open

## Modification of Social Determinants of Health by Critical Illness, and Consequences of that Modification for Recovery: An International Qualitative Study

|                               |                                                                                                                                                                                                                                                                                                                                                                                                                                                                                                                                                                                                                                                                                                                                                                                                                                                                                                                                                                                                                                                                                                                                                                                                                                                                                                                                                                                                                                                                                                                                                                                                                                                                                                                                                                                                                                                                                                                                                                                                                                                                                                                                                                                                                                                                                              |
|-------------------------------|----------------------------------------------------------------------------------------------------------------------------------------------------------------------------------------------------------------------------------------------------------------------------------------------------------------------------------------------------------------------------------------------------------------------------------------------------------------------------------------------------------------------------------------------------------------------------------------------------------------------------------------------------------------------------------------------------------------------------------------------------------------------------------------------------------------------------------------------------------------------------------------------------------------------------------------------------------------------------------------------------------------------------------------------------------------------------------------------------------------------------------------------------------------------------------------------------------------------------------------------------------------------------------------------------------------------------------------------------------------------------------------------------------------------------------------------------------------------------------------------------------------------------------------------------------------------------------------------------------------------------------------------------------------------------------------------------------------------------------------------------------------------------------------------------------------------------------------------------------------------------------------------------------------------------------------------------------------------------------------------------------------------------------------------------------------------------------------------------------------------------------------------------------------------------------------------------------------------------------------------------------------------------------------------|
| Journal:                      | <i>BMJ Open</i>                                                                                                                                                                                                                                                                                                                                                                                                                                                                                                                                                                                                                                                                                                                                                                                                                                                                                                                                                                                                                                                                                                                                                                                                                                                                                                                                                                                                                                                                                                                                                                                                                                                                                                                                                                                                                                                                                                                                                                                                                                                                                                                                                                                                                                                                              |
| Manuscript ID                 | bmjopen-2021-060454.R1                                                                                                                                                                                                                                                                                                                                                                                                                                                                                                                                                                                                                                                                                                                                                                                                                                                                                                                                                                                                                                                                                                                                                                                                                                                                                                                                                                                                                                                                                                                                                                                                                                                                                                                                                                                                                                                                                                                                                                                                                                                                                                                                                                                                                                                                       |
| Article Type:                 | Original research                                                                                                                                                                                                                                                                                                                                                                                                                                                                                                                                                                                                                                                                                                                                                                                                                                                                                                                                                                                                                                                                                                                                                                                                                                                                                                                                                                                                                                                                                                                                                                                                                                                                                                                                                                                                                                                                                                                                                                                                                                                                                                                                                                                                                                                                            |
| Date Submitted by the Author: | 10-May-2022                                                                                                                                                                                                                                                                                                                                                                                                                                                                                                                                                                                                                                                                                                                                                                                                                                                                                                                                                                                                                                                                                                                                                                                                                                                                                                                                                                                                                                                                                                                                                                                                                                                                                                                                                                                                                                                                                                                                                                                                                                                                                                                                                                                                                                                                                  |
| Complete List of Authors:     | <p>McPeake, Joanne; University of Cambridge, The Institute of Healthcare Improvement Studies<br/>         Boehm , Leanne ; Vanderbilt University, School of Nursing<br/>         Hibbert , Elizabeth; Western Health Foundation, Department of Physiotherapy<br/>         Hauschildt , Katrina; VA Ann Arbor Healthcare System, Center for Clinical Management Research<br/>         Bakhru, Rita; Wake Forest University School of Medicine, Department of Internal Medicine<br/>         Bastin, Anthony ; Barts Health NHS Trust, Department of Peri-operative Medicine<br/>         Butcher , Brad ; University of Pittsburgh<br/>         Eaton , Tammy; University of Pittsburgh<br/>         Harris , Wendy; University College London<br/>         Hope , Aluko; Yeshiva University Albert Einstein College of Medicine<br/>         Jackson, James; Vanderbilt University,<br/>         Johnson , Annie; Mayo Clinic<br/>         Kloos , Janet; University Hospitals Cleveland Medical Center<br/>         Korzick , Karen ; Geisinger Medical Center<br/>         McCartney , Judith; NHS Greater Glasgow and Clyde<br/>         Meyer, Joel; Guy's and St Thomas' NHS Foundation Trust,<br/>         Montgomery-Yates , Ashley ; University of Kentucky<br/>         Quasim, Tara; NHS Greater Glasgow and Clyde; University of Glasgow College of Medical Veterinary and Life Sciences, School of Medicine, Dentistry and Nursing<br/>         Slack, Andrew; King's College London, Department of Critical Care; Guy's and St Thomas' Hospitals NHS Trust, Department of Critical Care<br/>         Wade, Dorothy; University College London Hospitals NHS Foundation Trust<br/>         Still , Mary; Emory University Hospital<br/>         Netzer , Giora; University of Maryland School of Medicine<br/>         Hopkins, Ramona ; Intermountain Medical Center, Center for Humanizing Critical Care and Pulmonary/Critical Care Medicine; Brigham Young University, Psychology and Neuroscience<br/>         Mikkelsen , Mark; Hospital of the University of Pennsylvania<br/>         Iwashyna, Theodore; University of Michigan,<br/>         Haines, Kimberley; Sunshine Hospital, Physiotherapy<br/>         Sevin , Carla ; Vanderbilt University Medical Center</p> |

1  
2  
3  
4  
5  
6  
7  
8  
9  
10  
11  
12  
13  
14  
15  
16  
17  
18  
19  
20  
21  
22  
23  
24  
25  
26  
27  
28  
29  
30  
31  
32  
33  
34  
35  
36  
37  
38  
39  
40  
41  
42  
43  
44  
45  
46  
47  
48  
49  
50  
51  
52  
53  
54  
55  
56  
57  
58  
59  
60

|                                   |                                                                                     |
|-----------------------------------|-------------------------------------------------------------------------------------|
| <b>Primary Subject Heading:</b>   | Intensive care                                                                      |
| <b>Secondary Subject Heading:</b> | Health services research                                                            |
| <b>Keywords:</b>                  | Adult intensive & critical care < ANAESTHETICS, PUBLIC HEALTH, QUALITATIVE RESEARCH |
|                                   |                                                                                     |

SCHOLARONE™  
Manuscripts



I, the Submitting Author has the right to grant and does grant on behalf of all authors of the Work (as defined in the below author licence), an exclusive licence and/or a non-exclusive licence for contributions from authors who are: i) UK Crown employees; ii) where BMJ has agreed a CC-BY licence shall apply, and/or iii) in accordance with the terms applicable for US Federal Government officers or employees acting as part of their official duties; on a worldwide, perpetual, irrevocable, royalty-free basis to BMJ Publishing Group Ltd ("BMJ") its licensees and where the relevant Journal is co-owned by BMJ to the co-owners of the Journal, to publish the Work in this journal and any other BMJ products and to exploit all rights, as set out in our [licence](#).

The Submitting Author accepts and understands that any supply made under these terms is made by BMJ to the Submitting Author unless you are acting as an employee on behalf of your employer or a postgraduate student of an affiliated institution which is paying any applicable article publishing charge ("APC") for Open Access articles. Where the Submitting Author wishes to make the Work available on an Open Access basis (and intends to pay the relevant APC), the terms of reuse of such Open Access shall be governed by a Creative Commons licence – details of these licences and which [Creative Commons](#) licence will apply to this Work are set out in our licence referred to above.

Other than as permitted in any relevant BMJ Author's Self Archiving Policies, I confirm this Work has not been accepted for publication elsewhere, is not being considered for publication elsewhere and does not duplicate material already published. I confirm all authors consent to publication of this Work and authorise the granting of this licence.

1  
2  
3 **Title: Modification of Social Determinants of Health by Critical Illness, and Consequences of that**  
4 **Modification for Recovery: An International Qualitative Study**  
5  
6

7 **Joanne M. McPeake** PhD, MSc, BN (Hons), RGN \*Corresponding author

8 Glasgow Royal Infirmary, NHS Greater Glasgow and Clyde, Scotland, UK

9 School of Medicine, Dentistry and Nursing, University of Glasgow, Scotland, UK

10 THIS. Institute (University of Cambridge)

11 Email: [joanne.mcpeake@glasgow.ac.uk](mailto:joanne.mcpeake@glasgow.ac.uk)  
12  
13  
14  
15  
16

17 **Leanne M. Boehm** PhD, RN, ACNS-BC

18 School of Nursing, Vanderbilt University, Nashville, Tennessee, US  
19  
20  
21

22 **Elizabeth Hibbert** B.Physiotherapy

23 Department of Physiotherapy, Western Health, Melbourne, Victoria, Australia  
24  
25  
26

27 **Katrina Hauschildt, PhD**

28 Center for Clinical Management Research, VA Ann Arbor Healthcare System, Ann Arbor, Michigan,

29 US  
30  
31  
32  
33

34 **Rita N Bakhru** MD, MS

35 Wake Forest University School of Medicine, Department of Internal Medicine, Section of Pulmonary,

36 Critical Care, Allergy and Immunology, Winston Salem, North Carolina, US  
37  
38  
39  
40

41 **Anthony J Bastin** MBBS PhD

42 Department of Peri-operative Medicine, St Bartholomew's Hospital, Barts Health NHS Trust, London,

43 UK  
44  
45  
46  
47

48 **Brad W Butcher** MD

49 Department of Critical Care Medicine, University of Pittsburgh Medical Center, Pittsburgh, US  
50  
51  
52

53 **Tammy L Eaton** MSN, RN, FNP-BC, ACHPN

54 Department of Critical Care Medicine, University of Pittsburgh Medical Center, Pittsburgh, US  
55  
56  
57

58 **Wendy Harris**, RGN

59 University College London Hospitals NHS Foundation Trust, London, UK  
60

1  
2  
3 **Aluko A Hope** MD, MSCE

4 Division of Critical Care Medicine, Albert Einstein College of Medicine of Yeshiva University, New York,  
5  
6 US  
7

8  
9  
10 **James Jackson** PsyD

11 Vanderbilt University Medical Center, Tennessee, US  
12

13  
14  
15 **Annie Johnson** APRN, ACNP-BC

16 Pulmonary and Critical Care Medicine, Mayo Clinic, Rochester, Minnesota, US  
17

18  
19  
20 **Janet A. Kloos** RN, PhD, APRN-CCNS, CCRN

21 University Hospitals Cleveland Medical Center, Cleveland, Ohio, US  
22

23  
24  
25 **Karen A Korzick** MD

26 Geisinger Medical Center, Pulmonary and Critical Care Medicine, Pennsylvania, US  
27

28  
29  
30 **Judith McCartney** MBChB, MPH

31 Queen Elizabeth University Hospital, Glasgow, UK  
32

33  
34  
35 **Joel Meyer** BM BCh DM

36 Guy's & St Thomas' NHS Foundation Trust, London, UK  
37

38  
39  
40 **Ashley Montgomery-Yates** MD

41 Division of Pulmonary, Critical Care and Sleep Medicine, University of Kentucky, Kentucky, US  
42

43  
44  
45 **Tara Quasim** MBChB, MD

46 Glasgow Royal Infirmary, NHS Greater Glasgow and Clyde, Scotland, UK  
47

48  
49  
50 **Andrew Slack**, MBBS, MRCP, EDIC, MD (Res)

51 Guy's & St Thomas' NHS Foundation Trust, London, UK  
52

53  
54  
55 **Dorothy Wade** PhD, MSc

56 University College London Hospitals NHS Foundation Trust , London, UK  
57  
58  
59  
60

1  
2  
3 **Mary Still** APRN, ACNS, ANP-BS, CCRN, FCCM

4 Emory University Hospital (Emory Healthcare), Georgia, USA  
5  
6  
7

8 **Giora Netzer** MD, MSCE

9 Division of Pulmonary and Critical Care Medicine, University of Maryland School of Medicine

10 Department of Epidemiology and Public Health, University of Maryland School of Medicine,  
11 Maryland, US  
12  
13  
14

15  
16 **Ramona O Hopkins** PhD

17 Department of Medicine, Pulmonary and Critical Care Division, Intermountain Medical Center,  
18 Murray, Utah, US  
19

20 Center for Humanizing Critical Care, Intermountain Health Care, Murray, Utah, US

21 Psychology Department and Neuroscience Center, Brigham Young University, Provo, Utah, US  
22  
23  
24  
25

26 **Mark E Mikkelsen** MD, MSCE

27 Division of Pulmonary, Allergy, and Critical Care Medicine, Hospital of the University of Pennsylvania,  
28 Philadelphia, US  
29  
30  
31

32  
33 **Theodore J Iwashyna** MD, PhD

34 Department of Medicine, Division of Pulmonary & Critical Care, University of Michigan, Ann Arbor,  
35 Michigan, US  
36

37 Center for Clinical Management Research, VA Ann Arbor Healthcare System, Ann Arbor, Michigan,  
38 US  
39  
40  
41  
42

43 **Co-Senior Authors**

44 **Kimberley J. Haines** PhD, BHSc (Physiotherapy)

45 Department of Physiotherapy, Western Health

46 Department of Critical Care, Melbourne Medical School, The University of Melbourne  
47  
48  
49  
50

51 **Carla M. Sevin** MD

52 Department of Medicine, Division of Allergy, Pulmonary, and Critical Care Medicine, Vanderbilt  
53 University Medical Center, Nashville, Tennessee, US  
54  
55  
56  
57

58 On behalf of the Society of Critical Care Medicine's THRIVE Initiative  
59  
60



1  
2  
3 Word Count: 3000  
4  
5

6 **Abstract**

7 **Purpose:** Social determinants of health (SDoH) contribute to health outcomes. We identified SDoH  
8  
9 that were modified by critical illness, and the effect of such modifications on recovery from critical  
10  
11 illness.  
12

13  
14 **Materials and Methods:** Patients and caregivers from three continents, took part in qualitative, in-  
15  
16 depth semi structured interviews following hospital discharge. Interview transcripts were mapped  
17  
18 against a pre-existing social policy framework: money and work; skills and education; housing,  
19  
20 transport and neighbourhoods and family, friends and social connections.  
21  
22

23 **Results:** 86 interviews were analysed (66 patient and 20 caregiver). SDoH, both financial and non-  
24  
25 financial in nature, could be negatively influenced by exposure to critical illness, with a direct impact  
26  
27 on health-related outcomes at an individual level. Financial modifications included changes to  
28  
29 employment status due to critical illness related disability, alongside changes to income and insurance  
30  
31 status. Negative health impacts included the inability to access essential healthcare and an increase  
32  
33 in mental health problems.  
34  
35

36 **Conclusions** Critical illness appears to modify SDoH for survivors and their family members, potentially  
37  
38 impacting recovery and health. Our findings suggest that increased attention to issues such as one's  
39  
40 social network, economic security, and access to healthcare are required following discharge from  
41  
42 critical care.  
43  
44

45  
46  
47  
48 **Keywords:** socio-economic; post intensive care syndrome; qualitative and rehabilitation.  
49  
50  
51  
52  
53  
54  
55  
56  
57  
58  
59  
60

## Article Summary

### Strengths and Limitations of the study

- This international multi-centre study utilised in-depth semi structured interviews to understand how the social determinants of health were modified by critical illness.
- Utilised replicable, rigorous qualitative methods, it suggests a complex interplay between the social determinants of health and recovery from critical illness.
- Although the sample size is considerable for a qualitative study, we recognize that we have utilised a convenience sample, with a small portion of all critical care survivors in these countries.

## Introduction

The Social determinants of health (SDoH) are the non-medical factors which influence health outcomes and include both upstream policy, environmental, and context factors and their manifestations in terms of individual material and social hardship(1). There has been a growing realization of their central role in shaping the capacity of individuals to not only access high quality care, but also to benefit from such care(2). In some discussions, particularly around the role of SDoH impacting outcomes from acute illness and hospitalization, such factors are conceptualized as causally antecedent to medical care and illness.

Illness can itself result in material and social hardship, opening the possibility of a bidirectional relationship(3). Financial toxicity resulting from oncologic care has been documented and is also found after surgery and respiratory failure(4, 5). Adverse employment outcomes are common after acute myocardial infarction, stroke, and critical illness(6-8). While changes in individual economic and social situations may be exacerbated by gaps in the U.S. social safety net, many have been documented throughout the industrialized world(9).

Within the critical care context, more detailed evidence is emerging about the potential interaction between SDoH and recovery. For example, a recent multi-centre study from the US revealed that social isolation was a risk factors for poor outcomes (mortality) among older adults surviving critical illness (10). Similarly, in the UK, recent data has shown that almost one third of participants requested a social and welfare consultation during an ICU recovery clinic, in order to alleviate ongoing welfare and social issues (11). However, a full and systematic understanding of the challenges survivors face, alongside how critical illness may worsen SDoH, is lacking.

The objective of this study, therefore, was to identify SDoH that were modified at the individual level by the experience of critical illness, and the effect of such modifications on patients' and families'

1  
2  
3 recovery. We conducted an international qualitative study of the experience of recovery from critical  
4  
5 illness with patients and caregivers from 14 different hospitals across Australia, the US, and the UK.  
6  
7  
8  
9  
10  
11  
12  
13  
14  
15  
16  
17  
18  
19  
20  
21  
22  
23  
24  
25  
26  
27  
28  
29  
30  
31  
32  
33  
34  
35  
36  
37  
38  
39  
40  
41  
42  
43  
44  
45  
46  
47  
48  
49  
50  
51  
52  
53  
54  
55  
56  
57  
58  
59  
60

For peer review only

## Methods

### *Design and Setting*

We utilised a qualitative, descriptive design. Sites participating in the Society of Critical Care Medicine's (SCCM) THRIVE programme (12) offered Intensive Care Unit (ICU) recovery programmes in the form of post-ICU clinics and peer support programmes. Patients who had not received any specific intervention were also interviewed (**Table 1**).

The THRIVE programme was a programme of work run via the SCCM for five years. It actively recruited hospitals internationally to work with the Society to support innovation in the field of ICU recovery up until 2019. It ran two collaboratives: peer support and post-ICU clinics. We invited sites to take part in this programme of work from these two collaboratives.

We chose to undertake interviews internationally, in three developed nations, where the social context for support and health needs could be fully understood. The purpose of this, was to understand if different developed healthcare systems supported care in diverse ways.

Patients attending ICU recovery programmes were invited by professionals at each site if they met: i) Inclusion criteria - English-speaking patients older than 18 years admitted to the ICU, or caregiver of a patient who survived critical illness; and not ii) Exclusion criteria - ongoing severe neurological and/or cognitive impairment or continued inpatient care in hospital or rehabilitation. Informed consent was obtained before each interview.

### *Data collection*

Data were collected through in-depth semi-structured scripted interviews via telephone. Separate questions were used for caregivers and patients; these were adapted for those who did not receive a post critical illness intervention (**S1**). Questions were generated from previous literature and through

1  
2  
3 iterative discussion within the research group (JMM, LB, KJH, CS). All researchers, alongside patient  
4  
5 representatives, discussed the interview script to ensure consistency. Some interviewers were known  
6  
7 to the participants through their role in direct clinical care. Data were audio-recorded and transcribed  
8  
9 verbatim.  
10

### 11 12 13 14 *Data Analyses*

15  
16 We sought to understand how SDoH were potentially modified at the individual level by the  
17  
18 experience of critical illness, and the effect of such modifications on recovery. To do so, we  
19  
20 systematically mapped our analysis against a set of pre-defined concepts related to SDoH, adapted  
21  
22 from a public policy framework(13), including: money and work; education and skills; housing  
23  
24 transportation and neighbourhoods; and family, friends and social connections. In this analysis, we  
25  
26 defined a 'rural' setting as a located out with a main town or city.  
27  
28  
29  
30

31  
32 The Framework Analysis technique was used to analyze data across these concepts(14) , through  
33  
34 seven stages: 1) Transcription; 2) Familiarization with the interview; 3) Coding; 4) Developing a  
35  
36 working analytical framework; 5) Applying the analytical framework; 6) Charting data into the  
37  
38 framework matrix; 7) Interpreting the data(11). This analytical framework is widely used in policy  
39  
40 settings and allows structured and systematic analysis of qualitative data. Three researchers (JMM,  
41  
42 LB, JM) independently undertook preliminary sweeps of the data. Key quotes to support the findings  
43  
44 were then independently extracted by JMM and JM. Member checking with a small number of  
45  
46 interview participants was undertaken pre and post analysis to enhance rigour of the reported results.  
47  
48  
49 The Consolidated Reporting of Qualitative Research (COREQ) checklist was used for this study(15).  
50  
51  
52  
53

### 54 *Patient and Public Involvement*

55  
56 Patients and caregivers who had previously been admitted to intensive care helped create the  
57  
58 interview schedules utilised for this study. These representatives helped developed question content  
59  
60

1  
2  
3 and structure. The also supported the planning of the study conduct and reviewed all study  
4  
5 documentation.  
6  
7

8  
9 *Permissions*

10  
11 Study design and protocol were approved by the Western Health Low Risk Human Research Ethics  
12  
13 Panel (Australia, Ref: HREC/17/WH/170); Vanderbilt University Institutional Review Board (US  
14  
15 coordinating site, Ref: 171299); and the Southwest (Cornwall and Plymouth, Ref: 18/SW/0137)  
16  
17  
18 Research Ethics Committee (UK).  
19  
20  
21  
22  
23  
24  
25  
26  
27  
28  
29  
30  
31  
32  
33  
34  
35  
36  
37  
38  
39  
40  
41  
42  
43  
44  
45  
46  
47  
48  
49  
50  
51  
52  
53  
54  
55  
56  
57  
58  
59  
60

## Results

Across 14 sites, interviews were completed with 66 patients and 20 caregivers from Australia, the US, and the UK (**Table 1**). Interviews took place between July 2018 and February 2019. We analysed the data across four main domains of SDoH: money and work; education and skills; housing transportation and neighbourhoods; and family, friends and social connections. We have presented each SDoH as an individual category, however, how this particular category of SDoH influenced outcomes and indeed other SDoH are also explored. Supporting quotes, illustrating these concepts can be found in

**Table 2.**

For peer review only



| <b>Demographic</b>                               | <b>Patients (n=66)</b> | <b>Caregivers (n=20)</b> |
|--------------------------------------------------|------------------------|--------------------------|
| Age (years), Median (IQR)                        | 52 (40-62.5)           | 52 (46-67)               |
| Gender, n male (%)                               | 26 (39.4)              | 3 (15)                   |
| <b>Patient Admission Diagnosis n (%)</b>         |                        |                          |
| Sepsis                                           | 28 (42.4)              |                          |
| Respiratory Failure                              | 15 (22.8)              |                          |
| Post GI Surgery                                  | 5 (7.6)                |                          |
| Trauma                                           | 2 (3)                  |                          |
| Other                                            | 16 (24.2)              |                          |
| <b>Ventilated, n (%)</b>                         |                        |                          |
| Yes                                              | 57 (86.4)              |                          |
| No                                               | 9 (13.6)               |                          |
| <b>Length of time since ICU discharge, n (%)</b> |                        |                          |
| <6 months                                        | 15 (22.8)              |                          |
| 7-11 months                                      | 9 (13.6)               |                          |
| 1-2 years                                        | 12 (18.2)              |                          |
| 2-5 years                                        | 22 (33.3)              |                          |
| >5 years                                         | 8 (12.1)               |                          |
| <b>Relationship to the patient, n (%)</b>        |                        |                          |
| Spouse/Significant other                         |                        | 10 (50)                  |
| Parent                                           |                        | 5 (25)                   |
| Sibling                                          |                        | 3 (15)                   |
| Child                                            |                        | 2 (10)                   |
| <b>Nationality, n (%)</b>                        |                        |                          |
| United States                                    | 50 (75.7)              | 16 (80)                  |
| UK                                               | 13 (19.7)              | 2 (10)                   |
| Australia                                        | 3 (4.6)                | 2 (10)                   |
| <b>Participated in recovery programme, n (%)</b> |                        |                          |
| Yes                                              | 52 (79)                | 11 (55)                  |
| No                                               | 14 (21)                | 9 (45)                   |

**Table One: Participant Demographics**

### Money and work

Loss of both money and work following critical illness was discussed frequently across the interviews.

For example, a patient from Australia described how their new critical illness disability had changed their employment status:

*'I come home and now you've lost your job and you can't work and then the realisation that you are on oxygen for the rest of your life.'*

Job loss and change had a direct negative impact on income, access to care and subsequent recovery from critical illness. For example, one patient of the loss of not only insurance but also savings during critical illness and the recovery period following forced unemployment:

*'For the first surgery I had two insurances.. second surgery, my school, they were nice enough to keep me on there, but then I lost it because I wasn't working.... We had a little savings, but that's all gone, because we have had to use it for medical bills and driving to the hospital an hour and a half.'*

There were health-related consequences of the changes. For example, participants described how they could no longer afford the treatments necessary for recovery:

| Social Determinant of Health Modification         | Illustrative Quote                                                                                                                                                                                                                                                                                                                                                                                                                                                                                                                                                                                                                                                                                                                                                                                                                                                                                                                                                                                                                                                                                                                                                                                                                                                                                                                                                                                                                                                                                                                                                                                                                                                                                                                                                                                  |
|---------------------------------------------------|-----------------------------------------------------------------------------------------------------------------------------------------------------------------------------------------------------------------------------------------------------------------------------------------------------------------------------------------------------------------------------------------------------------------------------------------------------------------------------------------------------------------------------------------------------------------------------------------------------------------------------------------------------------------------------------------------------------------------------------------------------------------------------------------------------------------------------------------------------------------------------------------------------------------------------------------------------------------------------------------------------------------------------------------------------------------------------------------------------------------------------------------------------------------------------------------------------------------------------------------------------------------------------------------------------------------------------------------------------------------------------------------------------------------------------------------------------------------------------------------------------------------------------------------------------------------------------------------------------------------------------------------------------------------------------------------------------------------------------------------------------------------------------------------------------|
| <b>Family, Friends and Social Connections</b>     | <p>'I went back to my daughters and I stayed there for a while. I relaxed and um I did relax...I had my grandchildren around me who I think are one of the best healer's um because just being with them makes me feel erm good...'</p> <p>'God has helped me through the ministry...for 50 years we were pastors. Knowing and seeing how he has worked with other people in their lives, I think has given me the experiences to know that' hey you don't have to do this by yourself'.</p> <p>'Our friends all disappeared. ...I'm not who I was before. I think that, for most people, they couldn't deal with it. And so our community just sort of vanished.</p> <p>"I would feel better and I wouldn't feel so alone with all of this. Because while my family was supportive, they reached a point where they didn't want to talk about it. They didn't want to relive it."</p>                                                                                                                                                                                                                                                                                                                                                                                                                                                                                                                                                                                                                                                                                                                                                                                                                                                                                                              |
| <b>Money and Work</b>                             | <p>'Financially...for the first surgery I had two insurances, mine and my husband. Second surgery, my school, they were nice enough to keep me on there, but then I lost it, because I wasn't working. Financially, if its less than a year you've got deductibles. There's no plan that helps people that are working...if we were very, very poor, or very, very rich, but there's nothing that helps you in the middle. There isn't.... We had a little bit of savings, but that's all gone, because we've had to use it medical bills, and driving to the hospital an hour and a half.'</p> <p>'Whether you know when he came home, whether the house had to be reconfigured for a wheelchair or anything like that- that was another challenge not knowing as well, financial circumstances that's another challenge you know- he's out of work he was a breadwinner and now he's not sort of thing and who do we rely, what do we do, and everything like that- that's a big issue I think with everyone who is sick I suppose. '</p> <p>'I would say being able to get back into the field of work and build relationships and actually function....I just felt worthless, because without your money...We associate money with the ability to educate or be educated. There's no secret'.</p> <p>'I think it's changing the paradigm from thinking that ICU is the endpoint...with medicine the way it is, it isn't the next step to the funeral home necessarily...these people are surviving. They're not perishing.... it's affected every aspect of a person's family life. And often it's affecting their money. And things that are big, that are really going to impact them, and I don't think people realize. I think there just needs to be a better support system in place.</p> |
| <b>Skills and Education</b>                       | <p>'I was fully able to read small things in neurological journals. My husbands a physician, so I would take whatever passwords he had to things so I could get to the journals that normally lay pay can't get into them.'</p> <p>'I think that the other thing that's helped us do well is just some of the personal tools we have. We're not ashamed to ask or accept help, or to ask a question, or to be kind of vulnerable... some of that has to do with our education, like we're both very resourceful.... I can see if you've maybe poorly educated, I can see if you lived in a world where people haven't been trustworthy, so you don't trust people, I can see if we had different life experience, it could just look a lot differently.'</p>                                                                                                                                                                                                                                                                                                                                                                                                                                                                                                                                                                                                                                                                                                                                                                                                                                                                                                                                                                                                                                        |
| <b>Housing, Transportation and Neighbourhoods</b> | <p>'What I did, when I got back home, the only place I could sleep for a while was the recliner. I could not lay down on our bed.'</p> <p>'Now our hospital in (geographical area name) its good for a band-aid. If you have anything else wrong with you, you do not want to go there.'</p> <p>'I wanted to give back..... it would be easy for me not to go, because it's a long distance and its kind of a hassle to get up there.'</p>                                                                                                                                                                                                                                                                                                                                                                                                                                                                                                                                                                                                                                                                                                                                                                                                                                                                                                                                                                                                                                                                                                                                                                                                                                                                                                                                                          |

**Table 2: Modification of the SDoH at the individual level and potential effects of such modifications on recovery from critical illness**

1  
2  
3 *'my insurance company is messing with me right now... I'm out of my medicine. I'm out of one of them.*  
4  
5 *I called to see how much it was and I can't afford that. They want \$55 for seven days. I can't afford*  
6  
7 *that.'*  
8  
9

10  
11  
12 Participants discussed how these changes to money and work were a direct mechanism for mental  
13  
14 health problems. One participant from the US spoke about how changes to her health insurance had  
15  
16 increased feelings of anxiety:  
17

18  
19  
20  
21 *'There was an issue with the insurance....the first time said they weren't going to cover any of our*  
22  
23 *hospital bills. You can imagine... 'We're going to lose our house, oh my God...' The anxiety of it all. ....'*  
24  
25

26  
27  
28 A participant from the UK discussed changes to her employment situation following critical illness  
29  
30 and subsequent emotional disruption:  
31

32  
33  
34 *'I've changed jobs, I was a teacher before, but now I've gone into office work and I'm still trying to*  
35  
36 *adjust. My GP wrote a letter saying I wasn't fit to go back to teaching because of the kind of asthma*  
37  
38 *I've got...At the time I was devastated, I was really, really devastated.'*  
39  
40  
41

42  
43  
44 Caregivers suffered similar loss of money and work, albeit via different mechanisms. One participant  
45  
46 (patient) spoke about how their partner had lost their job due to new/increased caregiving  
47  
48 responsibilities following hospital discharge:  
49

50  
51  
52 *'I was working when I went in, and so was she and she had to take time off from work, and they had*  
53  
54 *let her go from work, after she wasn't making her units, and it made it rough on us.'*  
55  
56  
57  
58  
59  
60

### Skills and Education

The increased disability caused by critical illness resulted in an inability to return previous roles and activities. One participant, who had a highly skilled role, described the impact of cognitive disability on function:

*'My brain's just not making the connection...I'm retired but I was a judge and for a long time I wouldn't go back to court.... I can tell my brain is not making the connection.'*

Similarly, a participant who had been in a skilled academic role could no longer return to their previous appointment, because of critical illness-caused cognitive decline:

*'My identity was a writer and professor had been built around being smart and so those issues manifested themselves as word finding, executive functioning...I couldn't go back to work though. I was having cognitive difficulties...my request to have support for my particular cognitive deficits has been denied.'*

Such loss of skills required survivors to re-evaluate future career and employment prospects. One younger participant spoke of having to change educational pathways:

*'it's changed my career path. I'm only 20...I just turned 21. And so I'm still really young. I'm in college. I changed my major because of it.'*

### Housing, Transportation, and Neighbourhoods

New critical illness related disability significantly disrupted housing, transportation and residency in those survivors interviewed. Patients needed to move house due to physical inability:

1  
2  
3 *"It took, again, a lot of coordination and a lot of....Everyone pitched in...but it did provide a lot of stress,*  
4 *just in managing food and managing cleaning, and all the little things that you have to do from day to*  
5 *day. One of the reasons we began looking to move...having such a large house was a big struggle for*  
6 *her. Even going up and down stairs."*  
7  
8  
9  
10  
11  
12  
13

14 A participant from Australia spoke about the challenges to find funding for the housing adaptations  
15 which were required following critical illness and the financial and emotional stress this caused:  
16  
17

18  
19  
20  
21 *'when he came home whether the house had to be reconfigured for a wheelchair or anything like*  
22 *that...the financial circumstances that's another challenge... he was a breadwinner and now he's not*  
23 *and who de we rely, what do we do?'*  
24  
25  
26  
27  
28  
29

30 The burden of transportation rose for survivors, who now needed to attend more medical  
31 appointments. Yet many critical illness survivors could no longer drive, so this ongoing health burden  
32 caused disruption for the entire family unit:  
33  
34  
35

36  
37  
38  
39 *'It wasn't necessarily one doctor's appointment that stood out, but it was the fact that there were so*  
40 *many of them, and I think it was so significant because we had to drive an hour each way to get there.'*  
41  
42  
43  
44  
45

46 These changes influenced recovery for many, especially for those living in rural areas, as accessing  
47 appropriate and reliable healthcare became harder:  
48  
49

50  
51 *'I mean around here you're not going to find any medical help that's going to be decent. We're just*  
52 *so far removed from everything....quite a disadvantage of being so far away from everything.'*  
53  
54  
55  
56  
57  
58  
59  
60

1  
2  
3 Changes to how participants could access transport also had a direct impact on recovery. For example,  
4  
5 one participant spoke about how their inability to drive led to feelings of isolation:  
6  
7  
8  
9

10 *'I couldn't drive for quite a long time, so I felt fairly dependent, I felt pretty trapped in.'*  
11  
12  
13

#### 14 **Family, Friends and Social connections**

15  
16 Critical illness changed survivors' social networks and relationships within families. For example,  
17  
18 participants spoke about the negative impact of physical and emotional changes on wider social  
19  
20 networks:  
21  
22  
23  
24

25 *'and so our community sort of vanished... I still have these huge scars and I'm not who I was before. I*  
26  
27 *think for most people, they couldn't deal with it.'*  
28  
29  
30

31  
32 Critical illness also led to fractures in family networks. In some cases, families struggled to manage the  
33  
34 enormity of the situation, which led to challenges during recovery. For example, one survivor from  
35  
36 the UK highlighted the impact which it had on the family unit:  
37  
38  
39  
40

41 *'I was doing something in the kitchen, and I couldn't do it and I ended up smashing stuff all over the*  
42  
43 *kitchen and my brother came in and I started shouting at him, saying you know this is my life?'*  
44  
45  
46  
47

48 These changes had consequences during recovery. Participants described isolation, challenges re-  
49  
50 engaging with activities of daily living, and mental health problems related to these changes. A  
51  
52 participant from the US described how these changes had impacted their mental health and  
53  
54 behaviour:  
55  
56  
57  
58  
59  
60

1  
2  
3 *'No one talked to me about how I might be when I get home, like emotionally...I react to things... I feel*  
4 *bad 'cause its like hell for my family. I have these... I can't control them...just absolute fits of anger and*  
5 *rage... and just crying.'*  
6  
7  
8  
9  
10  
11  
12  
13  
14  
15  
16  
17  
18  
19  
20  
21  
22  
23  
24  
25  
26  
27  
28  
29  
30  
31  
32  
33  
34  
35  
36  
37  
38  
39  
40  
41  
42  
43  
44  
45  
46  
47  
48  
49  
50  
51  
52  
53  
54  
55  
56  
57  
58  
59  
60

For peer review only



## Discussion

This international, multi-centre study suggests a complex interplay between SDoH and recovery from critical illness. It is already well-established that upstream policy and contextual factors, as well as individual hardship, are associated with worsened onset of critical illness and outcomes; the early months of the COVID-19 epidemic particularly highlighted this(16). These qualitative results demonstrate how critical illness precipitated adverse changes in the recovery environment. These changes and other behavior changes resulted in lost connections with family and social support, loss of the instrumental, social, and psychological benefits of work, and having numerous other practical difficulties. Together these changes impeded successful access to and benefit from even traditional health services. Our findings provide evidence that the relationship between social determinants and recovery plays out across multiple domains of SDoH and recovery, as well as bi-directionally. Further, they demonstrate that the “social determinants of recovery” are not fixed nor the same as patients’ pre-illness statuses, suggesting a need to assess these mechanisms, and their impact, across time.

These findings can be situated in a broader body of work that suggests their generalizability. Inadequacies of the U.S. health and social safety net are well-described, but it is notable that the data for this study also included examples from Australia and the United Kingdom. Loss of employment and/or financial hardship after AMI, acute respiratory distress syndrome, or traumatic injury are not uncommon(6, 17, 18). Studies have likewise found many suffer from significant financial costs and related material hardship due to chronic and ongoing illness, such as cancer(19) and heart disease(20).

Some, but not all, of the difficulties here seem to be a failure of the insurance functions of existing organizational arrangements to buffer patients and their families against purely financial shocks of critical illness. This interpretation is reinforced by findings that specifically financial stress is central after acute respiratory failure(5), as well as work on surprise billing(21) and risk for high bills after surgery(22), or decades-old findings about patients self-management of diabetes in the presence of

1  
2  
3 cost concerns(23). Additionally, substantial evidence supports our findings that critical illness leads to  
4 other financial hardship through job loss, unpaid family caregiving, and new nonmedical expenses due  
5 to new disability(4, 7, 24). Moreover, recent data from the UK suggest that patients who have ongoing  
6 disability due to critical illness, are more likely to require government funded welfare support in the  
7 years following discharge, in comparison to contemporary hospital controls(25); concerns are  
8 emerging about COVID-19 patients(26, 27).  
9

10  
11  
12 Efforts to address these resulting financial hardships through direct payments to patients and  
13 caregivers have shown promise; the Medicaid Cash and Counseling program found improved patient  
14 and caregiver wellbeing alongside improved health outcomes(28, 29). Similarly, the US Department  
15 of Veteran Affairs' Program of Comprehensive Assistance to Family Caregivers suggests financial  
16 support provides crucial assistance in varied ways, depending on specific needs(30). In the UK, efforts  
17 to include social welfare consultation as part of critical illness recovery programs have also shown  
18 promise(11). These issues may become more prominent as moves to telehealth and remote  
19 monitoring require patients to bring more of their own technology to fully access services, potentially  
20 exacerbating inequities(31, 32).  
21  
22  
23  
24  
25  
26  
27  
28  
29  
30  
31  
32  
33  
34  
35  
36  
37  
38  
39  
40

41 Other challenges do not appear to be purely financial and would not be remediated by even  
42 theoretically complete insurance against total healthcare costs. Particularly prominent are the  
43 impacts of critical illness on social isolation. Social isolation is not benign; the influence of social  
44 relationships and social isolation on mortality is comparable to smoking, obesity and alcohol(33).  
45 initiatives across the UK and the US have successfully introduced innovation to support social isolation.  
46 For example, in Chicago, one health system added a social connection question to a pre-existing health  
47 screening tool, alongside care pathways such a friendly caller initiative to promote community  
48 socialisation during the COVID-19 pandemic(34). Peer support programmes which link individuals  
49 who have had similar healthcare experiences may also be advantageous, with evidence suggesting  
50  
51  
52  
53  
54  
55  
56  
57  
58  
59  
60

1  
2  
3 peer support could be a mechanism for reducing social isolation and improving global mental  
4  
5 health(35).  
6  
7  
8  
9

10 These data in the context of emerging literature have implications for clinicians and health systems  
11 seeking to promote full recovery of critically ill and other patients by addressing SDoH(36, 37). First,  
12 the data suggest that assessments of risk might include not just current hardship, but the extent to  
13 which the patients' reserves (broadly construed) are sufficient to prevent future hardship. It is unclear  
14 to what extent currently suggested patient-level risk assessments of SDoH(38, 39) are capable of  
15 predicting changes of the type these patients described. Second, given the myriad ways in which SDoH  
16 impacted each other following critical illness, understanding the impact of post-illness interventions  
17 (or lack thereof) must also be scrutinized across multiple domains, understanding that positive and  
18 negative consequences may be different for each patient. Certainly, targeted interventions to assure  
19 access to follow-up care, such as transportation support (e.g., Uber or Lyft vouchers) or telehealth  
20 support (e.g., device provision and training) can address some impacts. However, the multi-faceted  
21 and interactive results of our study also suggest that broader programs of direct assistance after  
22 critical illness, which address financial and non-financial resources, should be explored and potentially  
23 advocated for.  
24  
25  
26  
27  
28  
29  
30  
31  
32  
33  
34  
35  
36  
37  
38  
39  
40  
41  
42  
43

#### 44 *Limitations*

45 Strengths of this study include its international, multicenter approach to understanding the interplay  
46 between SDoH and recovery from critical illness. However, although the sample size is considerable  
47 for a qualitative study, we recognize that we have utilised a convenience sample, with a small portion  
48 of all critical care survivors in these countries. The sample size was not uniform across the three  
49 countries involved, which may have also influenced the reported results. We also do not have detailed  
50 in-hospital information for each patient.  
51  
52  
53  
54  
55  
56  
57  
58  
59  
60

1  
2  
3 We acknowledge that the primary aim of these interviews was not to delineate the socio-economic  
4 problems which participants faced during recovery from critical illness. As such, important concepts  
5 may have been missed in this analysis. For example, we did not find cross-country differences; this  
6 is an important construct which could have been missed. Finally, we have used a broad definition of  
7 the term 'rural' in this analysis to ensure that it is applicable internationally. However, there are  
8 international variances in rural and urban interfaces, as such we may be under or over reporting this  
9 as an issue.  
10  
11  
12  
13  
14  
15  
16  
17  
18  
19  
20

## 21 **Conclusion**

22  
23 In conclusion, this international, multi-center study has explored how critical illness changes social  
24 circumstances, impacting recovery and health. Our findings suggest that increased attention to issues  
25 such as one's social network, economic security, education and skills, access to healthcare, and living  
26 environment are required following critical care discharge. Targeting interventions toward these  
27 domains, including specific emphasis on social support and education, could potentially improve  
28 outcomes.  
29  
30  
31  
32  
33  
34  
35  
36  
37  
38  
39  
40  
41  
42  
43  
44  
45  
46  
47  
48  
49  
50  
51  
52  
53  
54  
55  
56  
57  
58  
59  
60

**Ethics and consent to participate:**

The study design and protocol were approved by the Western Health Low Risk Human Research Ethics Panel (Australia, Ref: HREC/17/WH/170); the Vanderbilt University Institutional Review Board (US coordinating site, Ref: 171299); and the Southwest (Cornwall and Plymouth, Ref: 18/SW/0137) Research Ethics Committee (UK). All participants provided informed consent.

**Consent for publication:**

N/A

**Availability of data:**

The dataset used is available on reasonable request from the corresponding author.

**Competing Interests:**

No conflicts of interest declared by other authors.

**Sources of Funding:** K Haines, J McPeake, L Boehm, C Sevin and Tara Quasim received funding from SCCM to undertake this work (NO AWARD NUMBER). L Boehm is funded by NIH/NHLBI (K12 HL137943) as is T J Iwashyna (K12 HL138039). J McPeake is funded by a THIS.Institute (University of Cambridge) Fellowship (PD- 2019-02-16/307748-01).

**Author Contribution:**

Conception and design: JM, CS, KH, TJI, MM

Data Extraction and Primary Analysis: JM, KH, CS, TJI and LB

Analysis and interpretation: LB, JM, TJI

Drafting and revising the manuscript for important intellectual content: ALL.

**Role of the funder:** This analysis was funded by the Society of Critical Care Medicine (SCCM). The scientific questions, analytic framework, data collection, and analysis were undertaken independently of the funder. The SCCM Council reviewed the manuscript and offered input prior to finalization.

**Acknowledgements:** The authors would like to acknowledge the funders for their support.

**Figure and Table Legends:**

Table One: Participant Demographics

Table 2: Modification of SDoH at the individual level and potential effects of such modifications on recovery from critical illness.

## References

1. Byhoff E, Kangovi S, Berkowitz SA, DeCamp M, Dzung E, Earnest M, et al. A Society of General Internal Medicine Position Statement on the Internists' Role in Social Determinants of Health. *Journal of General Internal Medicine*. 2020;35(9):2721-7.
2. Butler SM. What is the Outlook for Addressing Social Determinants of Health? *JAMA Health Forum*. 2021;2(9):e213639-e.
3. Mendes de Leon CF, Griggs JJ. Medical Debt as a Social Determinant of Health. *JAMA*. 2021;326(3):228-9.
4. Hauschildt KE, Seigworth C, Kamphuis LA, Hough CL, Moss M, McPeake JM, et al. Financial Toxicity After Acute Respiratory Distress Syndrome: A National Qualitative Cohort Study. *Crit Care Med*. 2020;48(8):1103-10.
5. Khandelwal N, Hough CL, Downey L, Engelberg RA, Carson SS, White DB, et al. Prevalence, Risk Factors, and Outcomes of Financial Stress in Survivors of Critical Illness. *Crit Care Med*. 2018;46(6):e530-e9.
6. Kamdar BB, Huang M, Dinglas VD, Colantuoni E, Wachter TMv, Hopkins RO, et al. Joblessness and Lost Earnings after Acute Respiratory Distress Syndrome in a 1-Year National Multicenter Study. *Am J Respir Crit Care Med*. 2017;196(8):1012-20.
7. McPeake J, Mikkelsen ME, Quasim T, Hibbert E, Cannon P, Shaw M, et al. Return to Employment after Critical Illness and Its Association with Psychosocial Outcomes. A Systematic Review and Meta-Analysis. *Ann Am Thorac Soc*. 2019;16(10):1304-11.
8. Garland A, Jeon S-H, Stepner M, Rotermann M, Fransoo R, Wunsch H, et al. Effects of cardiovascular and cerebrovascular health events on work and earnings: a population-based retrospective cohort study. *Canadian Medical Association Journal*. 2019;191(1):E3-E10.
9. Paul C, Boyes A, Hall A, Bisquera A, Miller A, O'Brien L. The impact of cancer diagnosis and treatment on employment, income, treatment decisions and financial assistance and their relationship to socioeconomic and disease factors. *Supportive Care in Cancer*. 2016;24(11):4739-46.
10. Falvey JR, Cohen AB, O'Leary JR, Leo-Summers L, Murphy TE, Ferrante LE. Association of Social Isolation With Disability Burden and 1-Year Mortality Among Older Adults With Critical Illness. *JAMA Internal Medicine*. 2021;181(11):1433-9.
11. McPeake JM, Henderson P, Darroch G, Iwashyna TJ, MacTavish P, Robinson C, et al. Social and economic problems of ICU survivors identified by a structured social welfare consultation. *Crit Care*. 2019;23(1):153.
12. McPeake J, Hirshberg EL, Christie LM, Drumright K, Haines K, Hough CL, et al. Models of Peer Support to Remediate Post-Intensive Care Syndrome: A Report Developed by the Society of Critical Care Medicine Thrive International Peer Support Collaborative. *Crit Care Med*. 2019;47(1):e21-e7.
13. Dodds S. Ten years of the Glasgow Centre for population Health: the evidence and implications. . In: Health GCfP, editor. Glasgow 2014
14. Gale NK, Heath G, Cameron E, Rashid S, Redwood S. Using the framework method for the analysis of qualitative data in multi-disciplinary health research. *BMC Medical Research Methodology*. 2013;13(1):117.
15. Tong A, Sainsbury P, Craig J. Consolidated criteria for reporting qualitative research (COREQ): a 32-item checklist for interviews and focus groups. *International Journal for Quality in Health Care*. 2007;19(6):349-57.
16. Lone NI, McPeake J, Stewart NI, Blayney MC, Seem RC, Donaldson L, et al. Influence of socioeconomic deprivation on interventions and outcomes for patients admitted with COVID-19 to critical care units in Scotland: A national cohort study. *The Lancet Regional Health – Europe*. 2021;1.

17. Warraich HJ, Kaltenbach LA, Fonarow GC, Peterson ED, Wang TY. Adverse Change in Employment Status After Acute Myocardial Infarction. *Circulation: Cardiovascular Quality and Outcomes*. 2018;11(6):e004528.
18. Murphy PB, Severance S, Savage S, Obeng-Gyasi S, Timsina LR, Zarzaur BL. Financial toxicity is associated with worse physical and emotional long-term outcomes after traumatic injury. *Journal of Trauma and Acute Care Surgery*. 2019;87(5):1189-96.
19. Zafar SY, Peppercorn JM, Schrag D, Taylor DH, Goetzinger AM, Zhong X, et al. The financial toxicity of cancer treatment: a pilot study assessing out-of-pocket expenses and the insured cancer patient's experience. *Oncologist*. 2013;18(4):381-90.
20. Valero-Elizondo J, Khera R, Saxena A, Grandhi GR, Virani SS, Butler J, et al. Financial Hardship From Medical Bills Among Nonelderly U.S. Adults With Atherosclerotic Cardiovascular Disease. *Journal of the American College of Cardiology*. 2019;73(6):727-32.
21. Chhabra KR, Sheetz KH, Nuliyalu U, Dekhne MS, Ryan AM, Dimick JB. Out-of-Network Bills for Privately Insured Patients Undergoing Elective Surgery With In-Network Primary Surgeons and Facilities. *JAMA*. 2020;323(6):538-47.
22. Scott JW, Raykar NP, Rose JA, Tsai TC, Zogg CK, Haider AH, et al. Cured into Destitution: Catastrophic Health Expenditure Risk Among Uninsured Trauma Patients in the United States. *Ann Surg*. 2018;267(6):1093-9.
23. Piette JD, Heisler M, Wagner TH. Cost-related medication underuse among chronically ill adults: the treatments people forgo, how often, and who is at risk. *Am J Public Health*. 2004;94(10):1782-7.
24. Griffiths J, Hatch RA, Bishop J, Morgan K, Jenkinson C, Cuthbertson BH, et al. An exploration of social and economic outcome and associated health-related quality of life after critical illness in general intensive care unit survivors: a 12-month follow-up study. *Crit Care*. 2013;17(3):R100.
25. McPeake J, Iwashyna TJ, Henderson P, Leyland AH, Mackay D, Quasim T, et al. Long term outcomes following critical care hospital admission: A prospective cohort study of UK biobank participants. *The Lancet Regional Health – Europe*. 2021;6.
26. Donnelly JP, Wang XQ, Iwashyna TJ, Prescott HC. Readmission and Death After Initial Hospital Discharge Among Patients With COVID-19 in a Large Multihospital System. *JAMA*. 2021;325(3):304-6.
27. Iwashyna TJ, Kamphuis LA, Gundel SJ, Hope AA, Jolley S, Admon AJ, et al. Continuing Cardiopulmonary Symptoms, Disability, and Financial Toxicity 1 Month After Hospitalization for Third-Wave COVID-19: Early Results From a US Nationwide Cohort. *J Hosp Med*. 2021.
28. Carlson BL, Foster L, Dale SB, Brown R. Effects of Cash and Counseling on personal care and well-being. *Health Serv Res*. 2007;42(1 Pt 2):467-87.
29. Coe NB, Guo J, Konetzka RT, Van Houtven CH. What is the marginal benefit of payment-induced family care? Impact on Medicaid spending and health of care recipients. *Health Econ*. 2019;28(5):678-92.
30. Sperber Nea. Family caregiver use and value of support services in the VA Program of Comprehensive Assistance for Family Caregivers. *Journal of long-term care* 2018 41-50.
31. VanderBeek BL. Telemedicine and the Exacerbation of Health Care Disparities. *JAMA Ophthalmology*. 2021.
32. Lyles CR, Wachter RM, Sarkar U. Focusing on Digital Health Equity. *JAMA*. 2021.

- 1  
2  
3 33. Holt-Lunstad J, Smith TB, Baker M, Harris T, Stephenson D. Loneliness and social  
4 isolation as risk factors for mortality: a meta-analytic review. *Perspect Psychol Sci.*  
5 2015;10(2):227-37.  
6  
7 34. Escalante E, Golden RL, Mason DJ. Social Isolation and Loneliness: Imperatives for  
8 Health Care in a Post-COVID World. *JAMA.* 2021;325(6):520-1.  
9 35. McPeake J, Iwashyna TJ, Boehm LM, Hibbert E, Bakhru RN, Bastin AJ, et al. Benefits  
10 of Peer Support for Intensive Care Unit Survivors: Sharing Experiences, Care Debriefing, and  
11 Altruism. *American Journal of Critical Care.* 2021;30(2):145-9.  
12 36. Falvey JR, Murphy TE, Leo-Summers L, Gill TM, Ferrante LE. Neighborhood  
13 Socioeconomic Disadvantage and Disability After Critical Illness. *Crit Care Med.* 9000.  
14 37. Bastian K, Hollinger A, Mebazaa A, Azoulay E, Féliot E, Chevreur K, et al. Association  
15 of social deprivation with 1-year outcome of ICU survivors: results from the FROG-ICU study.  
16 *Intensive Care Med.* 2018;44(12):2025-37.  
17 38. Moscrop A, Ziebland S, Bloch G, Iraola JR. If social determinants of health are so  
18 important, shouldn't we ask patients about them? *BMJ.* 2020;371:m4150.  
19 39. A Review of Tools to Screen for Social Determinants of Health in the United States: A  
20 Practice Brief. *Population Health Management.* 2020;23(6):422-9.  
21  
22  
23  
24  
25  
26  
27  
28  
29  
30  
31  
32  
33  
34  
35  
36  
37  
38  
39  
40  
41  
42  
43  
44  
45  
46  
47  
48  
49  
50  
51  
52  
53  
54  
55  
56  
57  
58  
59  
60



### **Supplemental File 1: Patient Interview Schedule**

1. Can you tell me about the how you have been getting on since you left hospital? <sup>[1]</sup><sub>[SEP]</sub>
2. Thinking back to what you recall of your time in ICU, and then walking through your recovery from hospital to home to now – what were the most important moments for you? What stands out the most to you?
3. Thinking about this time from ICU to home, what were some of the challenges you encountered along the way?
4. How did you try and solve some of these challenges? <sup>[1]</sup><sub>[SEP]</sub>
5. Can you describe any successful parts of your recovery? <sup>[1]</sup><sub>[SEP]</sub>
6. Thinking about your involvement in the ICU recovery programme, how did you feel when you received the invitation to take part?
7. What motivated you to participate? Why do you think you were able to participate at the time you did?
8. How did you feel when you first went to the program? Did that experience change over time? <sup>[1]</sup><sub>[SEP]</sub>
9. How has the programme influenced your recovery?
10. Has anyone commented on changes which they have seen in you, if so what have they said?
11. What do you think are the most important parts of a support programme?
12. How could we better support patients and their families following discharge from ICU?
13. If another patient was thinking about participating in such a programme, what would you say to them?
14. Is there anything else you would like to add or ask?

### **Informal Caregiver Interview Schedule**

1. Can you tell me about how you have been getting on since your loved one left hospital?
2. Thinking back to what you remember about being in the ICU, and then the recovery period through to now – what were the most important moments for you? What stands out the most to you?
3. Thinking about this time, what were some of the challenges you encountered along the way?
4. How did you try and solve some of these challenges?
5. What were some of your greatest successes as your provided support to your loved one?
6. Thinking about your involvement in the program (quote relevant program), how did you feel when you received the invitation to join this program?
7. What motivated you to participate? What made it possible for you to participate when you did?

- 1
- 2
- 3 8. How did you feel when you first went to the program? How did that experience change over time?
- 4
- 5 9. How has the program influenced your experience as a caregiver following ICU?
- 6
- 7 10. What do you think are the most important parts of a support program from ICU discharge to post-
- 8 hospital?
- 9
- 10 11. How could we better support patients and their caregivers following discharge from ICU? 12. Can
- 11 you describe what you think would help people cope better with recovery after being in ICU?
- 12
- 13 13. Is there anything else you would like to add or ask?
- 14
- 15
- 16
- 17
- 18
- 19
- 20
- 21
- 22
- 23
- 24
- 25
- 26
- 27
- 28
- 29
- 30
- 31
- 32
- 33
- 34
- 35
- 36
- 37
- 38
- 39
- 40
- 41
- 42
- 43
- 44
- 45
- 46
- 47
- 48
- 49
- 50
- 51
- 52
- 53
- 54
- 55
- 56
- 57
- 58
- 59
- 60

For peer review only

## COREQ (CONsolidated criteria for REporting Qualitative research) Checklist

A checklist of items that should be included in reports of qualitative research. You must report the page number in your manuscript where you consider each of the items listed in this checklist. If you have not included this information, either revise your manuscript accordingly before submitting or note N/A.

| Topic                                          | Item No. | Guide Questions/Description                                                                                                                              | Reported on Page No. |
|------------------------------------------------|----------|----------------------------------------------------------------------------------------------------------------------------------------------------------|----------------------|
| <b>Domain 1: Research team and reflexivity</b> |          |                                                                                                                                                          |                      |
| <i>Personal characteristics</i>                |          |                                                                                                                                                          |                      |
| Interviewer/facilitator                        | 1        | Which author/s conducted the interview or focus group?                                                                                                   |                      |
| Credentials                                    | 2        | What were the researcher's credentials? E.g. PhD, MD                                                                                                     |                      |
| Occupation                                     | 3        | What was their occupation at the time of the study?                                                                                                      |                      |
| Gender                                         | 4        | Was the researcher male or female?                                                                                                                       |                      |
| Experience and training                        | 5        | What experience or training did the researcher have?                                                                                                     |                      |
| <i>Relationship with participants</i>          |          |                                                                                                                                                          |                      |
| Relationship established                       | 6        | Was a relationship established prior to study commencement?                                                                                              |                      |
| Participant knowledge of the interviewer       | 7        | What did the participants know about the researcher? e.g. personal goals, reasons for doing the research                                                 |                      |
| Interviewer characteristics                    | 8        | What characteristics were reported about the interviewer/facilitator? e.g. Bias, assumptions, reasons and interests in the research topic                |                      |
| <b>Domain 2: Study design</b>                  |          |                                                                                                                                                          |                      |
| <i>Theoretical framework</i>                   |          |                                                                                                                                                          |                      |
| Methodological orientation and Theory          | 9        | What methodological orientation was stated to underpin the study? e.g. grounded theory, discourse analysis, ethnography, phenomenology, content analysis |                      |
| <i>Participant selection</i>                   |          |                                                                                                                                                          |                      |
| Sampling                                       | 10       | How were participants selected? e.g. purposive, convenience, consecutive, snowball                                                                       |                      |
| Method of approach                             | 11       | How were participants approached? e.g. face-to-face, telephone, mail, email                                                                              |                      |
| Sample size                                    | 12       | How many participants were in the study?                                                                                                                 |                      |
| Non-participation                              | 13       | How many people refused to participate or dropped out? Reasons?                                                                                          |                      |
| <i>Setting</i>                                 |          |                                                                                                                                                          |                      |
| Setting of data collection                     | 14       | Where was the data collected? e.g. home, clinic, workplace                                                                                               |                      |
| Presence of non-participants                   | 15       | Was anyone else present besides the participants and researchers?                                                                                        |                      |
| Description of sample                          | 16       | What are the important characteristics of the sample? e.g. demographic data, date                                                                        |                      |
| <i>Data collection</i>                         |          |                                                                                                                                                          |                      |
| Interview guide                                | 17       | Were questions, prompts, guides provided by the authors? Was it pilot tested?                                                                            |                      |
| Repeat interviews                              | 18       | Were repeat interviews carried out? If yes, how many?                                                                                                    |                      |
| Audio/visual recording                         | 19       | Did the research use audio or visual recording to collect the data?                                                                                      |                      |
| Field notes                                    | 20       | Were field notes made during and/or after the interview or focus group?                                                                                  |                      |
| Duration                                       | 21       | What was the duration of the interviews or focus group?                                                                                                  |                      |
| Data saturation                                | 22       | Was data saturation discussed?                                                                                                                           |                      |
| Transcripts returned                           | 23       | Were transcripts returned to participants for comment and/or                                                                                             |                      |

| Topic                                  | Item No. | Guide Questions/Description                                                                                                        | Reported on Page No. |
|----------------------------------------|----------|------------------------------------------------------------------------------------------------------------------------------------|----------------------|
|                                        |          | correction?                                                                                                                        |                      |
| <b>Domain 3: analysis and findings</b> |          |                                                                                                                                    |                      |
| <i>Data analysis</i>                   |          |                                                                                                                                    |                      |
| Number of data coders                  | 24       | How many data coders coded the data?                                                                                               |                      |
| Description of the coding tree         | 25       | Did authors provide a description of the coding tree?                                                                              |                      |
| Derivation of themes                   | 26       | Were themes identified in advance or derived from the data?                                                                        |                      |
| Software                               | 27       | What software, if applicable, was used to manage the data?                                                                         |                      |
| Participant checking                   | 28       | Did participants provide feedback on the findings?                                                                                 |                      |
| <i>Reporting</i>                       |          |                                                                                                                                    |                      |
| Quotations presented                   | 29       | Were participant quotations presented to illustrate the themes/findings?<br>Was each quotation identified? e.g. participant number |                      |
| Data and findings consistent           | 30       | Was there consistency between the data presented and the findings?                                                                 |                      |
| Clarity of major themes                | 31       | Were major themes clearly presented in the findings?                                                                               |                      |
| Clarity of minor themes                | 32       | Is there a description of diverse cases or discussion of minor themes?                                                             |                      |

Developed from: Tong A, Sainsbury P, Craig J. Consolidated criteria for reporting qualitative research (COREQ): a 32-item checklist for interviews and focus groups. *International Journal for Quality in Health Care*. 2007. Volume 19, Number 6: pp. 349 – 357

**Once you have completed this checklist, please save a copy and upload it as part of your submission. DO NOT include this checklist as part of the main manuscript document. It must be uploaded as a separate file.**

# BMJ Open

## Modification of Social Determinants of Health by Critical Illness, and Consequences of that Modification for Recovery: An International Qualitative Study

|                               |                                                                                                                                                                                                                                                                                                                                                                                                                                                                                                                                                                                                                                                                                                                                                                                                                                                                                                                                                                                                                                                                                                                                                                                                                                                                                                                                                                                                                                                                                                                                                                                                                                                                                                                                                                                                                                                                                                                                                                                                                                                                                                                                                                                                                                                                                              |
|-------------------------------|----------------------------------------------------------------------------------------------------------------------------------------------------------------------------------------------------------------------------------------------------------------------------------------------------------------------------------------------------------------------------------------------------------------------------------------------------------------------------------------------------------------------------------------------------------------------------------------------------------------------------------------------------------------------------------------------------------------------------------------------------------------------------------------------------------------------------------------------------------------------------------------------------------------------------------------------------------------------------------------------------------------------------------------------------------------------------------------------------------------------------------------------------------------------------------------------------------------------------------------------------------------------------------------------------------------------------------------------------------------------------------------------------------------------------------------------------------------------------------------------------------------------------------------------------------------------------------------------------------------------------------------------------------------------------------------------------------------------------------------------------------------------------------------------------------------------------------------------------------------------------------------------------------------------------------------------------------------------------------------------------------------------------------------------------------------------------------------------------------------------------------------------------------------------------------------------------------------------------------------------------------------------------------------------|
| Journal:                      | <i>BMJ Open</i>                                                                                                                                                                                                                                                                                                                                                                                                                                                                                                                                                                                                                                                                                                                                                                                                                                                                                                                                                                                                                                                                                                                                                                                                                                                                                                                                                                                                                                                                                                                                                                                                                                                                                                                                                                                                                                                                                                                                                                                                                                                                                                                                                                                                                                                                              |
| Manuscript ID                 | bmjopen-2021-060454.R2                                                                                                                                                                                                                                                                                                                                                                                                                                                                                                                                                                                                                                                                                                                                                                                                                                                                                                                                                                                                                                                                                                                                                                                                                                                                                                                                                                                                                                                                                                                                                                                                                                                                                                                                                                                                                                                                                                                                                                                                                                                                                                                                                                                                                                                                       |
| Article Type:                 | Original research                                                                                                                                                                                                                                                                                                                                                                                                                                                                                                                                                                                                                                                                                                                                                                                                                                                                                                                                                                                                                                                                                                                                                                                                                                                                                                                                                                                                                                                                                                                                                                                                                                                                                                                                                                                                                                                                                                                                                                                                                                                                                                                                                                                                                                                                            |
| Date Submitted by the Author: | 17-Jun-2022                                                                                                                                                                                                                                                                                                                                                                                                                                                                                                                                                                                                                                                                                                                                                                                                                                                                                                                                                                                                                                                                                                                                                                                                                                                                                                                                                                                                                                                                                                                                                                                                                                                                                                                                                                                                                                                                                                                                                                                                                                                                                                                                                                                                                                                                                  |
| Complete List of Authors:     | <p>McPeake, Joanne; University of Cambridge, The Institute of Healthcare Improvement Studies<br/>         Boehm , Leanne ; Vanderbilt University, School of Nursing<br/>         Hibbert , Elizabeth; Western Health Foundation, Department of Physiotherapy<br/>         Hauschildt , Katrina; VA Ann Arbor Healthcare System, Center for Clinical Management Research<br/>         Bakhru, Rita; Wake Forest University School of Medicine, Department of Internal Medicine<br/>         Bastin, Anthony ; Barts Health NHS Trust, Department of Peri-operative Medicine<br/>         Butcher , Brad ; University of Pittsburgh<br/>         Eaton , Tammy; University of Pittsburgh<br/>         Harris , Wendy; University College London<br/>         Hope , Aluko; Yeshiva University Albert Einstein College of Medicine<br/>         Jackson, James; Vanderbilt University,<br/>         Johnson , Annie; Mayo Clinic<br/>         Kloos , Janet; University Hospitals Cleveland Medical Center<br/>         Korzick , Karen ; Geisinger Medical Center<br/>         McCartney , Judith; NHS Greater Glasgow and Clyde<br/>         Meyer, Joel; Guy's and St Thomas' NHS Foundation Trust,<br/>         Montgomery-Yates , Ashley ; University of Kentucky<br/>         Quasim, Tara; NHS Greater Glasgow and Clyde; University of Glasgow College of Medical Veterinary and Life Sciences, School of Medicine, Dentistry and Nursing<br/>         Slack, Andrew; King's College London, Department of Critical Care; Guy's and St Thomas' Hospitals NHS Trust, Department of Critical Care<br/>         Wade, Dorothy; University College London Hospitals NHS Foundation Trust<br/>         Still , Mary; Emory University Hospital<br/>         Netzer , Giora; University of Maryland School of Medicine<br/>         Hopkins, Ramona ; Intermountain Medical Center, Center for Humanizing Critical Care and Pulmonary/Critical Care Medicine; Brigham Young University, Psychology and Neuroscience<br/>         Mikkelsen , Mark; Hospital of the University of Pennsylvania<br/>         Iwashyna, Theodore; University of Michigan,<br/>         Haines, Kimberley; Sunshine Hospital, Physiotherapy<br/>         Sevin , Carla ; Vanderbilt University Medical Center</p> |

1  
2  
3  
4  
5  
6  
7  
8  
9  
10  
11  
12  
13  
14  
15  
16  
17  
18  
19  
20  
21  
22  
23  
24  
25  
26  
27  
28  
29  
30  
31  
32  
33  
34  
35  
36  
37  
38  
39  
40  
41  
42  
43  
44  
45  
46  
47  
48  
49  
50  
51  
52  
53  
54  
55  
56  
57  
58  
59  
60

|                                   |                                                                                     |
|-----------------------------------|-------------------------------------------------------------------------------------|
| <b>Primary Subject Heading:</b>   | Intensive care                                                                      |
| <b>Secondary Subject Heading:</b> | Health services research                                                            |
| <b>Keywords:</b>                  | Adult intensive & critical care < ANAESTHETICS, PUBLIC HEALTH, QUALITATIVE RESEARCH |
|                                   |                                                                                     |

SCHOLARONE™  
Manuscripts



I, the Submitting Author has the right to grant and does grant on behalf of all authors of the Work (as defined in the below author licence), an exclusive licence and/or a non-exclusive licence for contributions from authors who are: i) UK Crown employees; ii) where BMJ has agreed a CC-BY licence shall apply, and/or iii) in accordance with the terms applicable for US Federal Government officers or employees acting as part of their official duties; on a worldwide, perpetual, irrevocable, royalty-free basis to BMJ Publishing Group Ltd ("BMJ") its licensees and where the relevant Journal is co-owned by BMJ to the co-owners of the Journal, to publish the Work in this journal and any other BMJ products and to exploit all rights, as set out in our [licence](#).

The Submitting Author accepts and understands that any supply made under these terms is made by BMJ to the Submitting Author unless you are acting as an employee on behalf of your employer or a postgraduate student of an affiliated institution which is paying any applicable article publishing charge ("APC") for Open Access articles. Where the Submitting Author wishes to make the Work available on an Open Access basis (and intends to pay the relevant APC), the terms of reuse of such Open Access shall be governed by a Creative Commons licence – details of these licences and which [Creative Commons](#) licence will apply to this Work are set out in our licence referred to above.

Other than as permitted in any relevant BMJ Author's Self Archiving Policies, I confirm this Work has not been accepted for publication elsewhere, is not being considered for publication elsewhere and does not duplicate material already published. I confirm all authors consent to publication of this Work and authorise the granting of this licence.

1  
2  
3 **Title: Modification of Social Determinants of Health by Critical Illness, and Consequences of that**  
4 **Modification for Recovery: An International Qualitative Study**  
5  
6

7 **Joanne M. McPeake** PhD, MSc, BN (Hons), RGN \*Corresponding author

8 Glasgow Royal Infirmary, NHS Greater Glasgow and Clyde, Scotland, UK

9 School of Medicine, Dentistry and Nursing, University of Glasgow, Scotland, UK

10 THIS. Institute (University of Cambridge)

11 Email: [joanne.mcpeake@glasgow.ac.uk](mailto:joanne.mcpeake@glasgow.ac.uk)  
12  
13  
14  
15  
16

17 **Leanne M. Boehm** PhD, RN, ACNS-BC

18 School of Nursing, Vanderbilt University, Nashville, Tennessee, US  
19  
20  
21

22 **Elizabeth Hibbert** B.Physiotherapy

23 Department of Physiotherapy, Western Health, Melbourne, Victoria, Australia  
24  
25  
26

27 **Katrina Hauschildt, PhD**

28 Center for Clinical Management Research, VA Ann Arbor Healthcare System, Ann Arbor, Michigan,

29 US  
30  
31  
32  
33

34 **Rita N Bakhru** MD, MS

35 Wake Forest University School of Medicine, Department of Internal Medicine, Section of Pulmonary,

36 Critical Care, Allergy and Immunology, Winston Salem, North Carolina, US  
37  
38  
39  
40

41 **Anthony J Bastin** MBBS PhD

42 Department of Peri-operative Medicine, St Bartholomew's Hospital, Barts Health NHS Trust, London,

43 UK  
44  
45  
46  
47

48 **Brad W Butcher** MD

49 Department of Critical Care Medicine, University of Pittsburgh Medical Center, Pittsburgh, US  
50  
51  
52

53 **Tammy L Eaton** MSN, RN, FNP-BC, ACHPN

54 Department of Critical Care Medicine, University of Pittsburgh Medical Center, Pittsburgh, US  
55  
56  
57

58 **Wendy Harris**, RGN

59 University College London Hospitals NHS Foundation Trust, London, UK  
60



1  
2  
3 **Aluko A Hope** MD, MSCE

4 Division of Critical Care Medicine, Albert Einstein College of Medicine of Yeshiva University, New York,  
5  
6 US  
7

8  
9  
10 **James Jackson** PsyD

11 Vanderbilt University Medical Center, Tennessee, US  
12

13  
14  
15 **Annie Johnson** APRN, ACNP-BC

16 Pulmonary and Critical Care Medicine, Mayo Clinic, Rochester, Minnesota, US  
17

18  
19  
20 **Janet A. Kloos** RN, PhD, APRN-CCNS, CCRN

21 University Hospitals Cleveland Medical Center, Cleveland, Ohio, US  
22

23  
24  
25 **Karen A Korzick** MD

26 Geisinger Medical Center, Pulmonary and Critical Care Medicine, Pennsylvania, US  
27

28  
29  
30 **Judith McCartney** MBChB, MPH

31 Queen Elizabeth University Hospital, Glasgow, UK  
32

33  
34  
35 **Joel Meyer** BM BCh DM

36 Guy's & St Thomas' NHS Foundation Trust, London, UK  
37

38  
39  
40 **Ashley Montgomery-Yates** MD

41 Division of Pulmonary, Critical Care and Sleep Medicine, University of Kentucky, Kentucky, US  
42

43  
44  
45 **Tara Quasim** MBChB, MD

46 Glasgow Royal Infirmary, NHS Greater Glasgow and Clyde, Scotland, UK  
47

48  
49  
50 **Andrew Slack**, MBBS, MRCP, EDIC, MD (Res)

51 Guy's & St Thomas' NHS Foundation Trust, London, UK  
52

53  
54  
55 **Dorothy Wade** PhD, MSc

56 University College London Hospitals NHS Foundation Trust , London, UK  
57  
58  
59  
60

1  
2  
3 **Mary Still** APRN, ACNS, ANP-BS, CCRN, FCCM

4 Emory University Hospital (Emory Healthcare), Georgia, USA  
5  
6  
7

8 **Giora Netzer** MD, MSCE

9  
10 Division of Pulmonary and Critical Care Medicine, University of Maryland School of Medicine  
11 Department of Epidemiology and Public Health, University of Maryland School of Medicine,  
12 Maryland, US  
13  
14

15  
16 **Ramona O Hopkins** PhD

17  
18 Department of Medicine, Pulmonary and Critical Care Division, Intermountain Medical Center,  
19 Murray, Utah, US  
20  
21 Center for Humanizing Critical Care, Intermountain Health Care, Murray, Utah, US  
22  
23 Psychology Department and Neuroscience Center, Brigham Young University, Provo, Utah, US  
24  
25

26  
27 **Mark E Mikkelsen** MD, MSCE

28 Division of Pulmonary, Allergy, and Critical Care Medicine, Hospital of the University of Pennsylvania,  
29 Philadelphia, US  
30  
31

32  
33 **Theodore J Iwashyna** MD, PhD

34  
35 Department of Medicine, Division of Pulmonary & Critical Care, University of Michigan, Ann Arbor,  
36 Michigan, US  
37  
38 Center for Clinical Management Research, VA Ann Arbor Healthcare System, Ann Arbor, Michigan,  
39 US  
40  
41

42  
43 **Co-Senior Authors**

44  
45 **Kimberley J. Haines** PhD, BHSc (Physiotherapy)

46 Department of Physiotherapy, Western Health

47 Department of Critical Care, Melbourne Medical School, The University of Melbourne  
48  
49

50  
51  
52 **Carla M. Sevin** MD

53 Department of Medicine, Division of Allergy, Pulmonary, and Critical Care Medicine, Vanderbilt  
54 University Medical Center, Nashville, Tennessee, US  
55  
56

57  
58 On behalf of the Society of Critical Care Medicine's THRIVE Initiative  
59  
60

1  
2  
3 Word Count: 3000  
4  
5  
6

7 **Abstract**

8 **Objectives:** Social determinants of health (SDoH) contribute to health outcomes. We identified SDoH  
9  
10 that were modified by critical illness, and the effect of such modifications on recovery from critical  
11  
12 illness.  
13

14 **Design:** In-depth semi structured interviews following hospital discharge. Interview transcripts were  
15  
16 mapped against a pre-existing social policy framework: money and work; skills and education;  
17  
18 housing, transport and neighbourhoods and family, friends and social connections.  
19

20 **Setting:** 14 hospital sites in the US, UK and Australia.  
21  
22

23 **Participants:** Patients and caregivers, who had been admitted to critical care from three continents.  
24

25 **Results:** 86 interviews were analysed (66 patient and 20 caregiver). SDoH, both financial and non-  
26  
27 financial in nature, could be negatively influenced by exposure to critical illness, with a direct impact  
28  
29 on health-related outcomes at an individual level. Financial modifications included changes to  
30  
31 employment status due to critical illness related disability, alongside changes to income and insurance  
32  
33 status. Negative health impacts included the inability to access essential healthcare and an increase  
34  
35 in mental health problems.  
36  
37

38 **Conclusions** Critical illness appears to modify SDoH for survivors and their family members, potentially  
39  
40 impacting recovery and health. Our findings suggest that increased attention to issues such as one's  
41  
42 social network, economic security, and access to healthcare are required following discharge from  
43  
44 critical care.  
45  
46

47 **Keywords:** socio-economic; post intensive care syndrome; qualitative and rehabilitation.  
48  
49  
50  
51  
52  
53  
54  
55  
56  
57  
58  
59  
60

## Article Summary

### Strengths and Limitations of the study

- This international multi-centre study utilised in-depth semi structured interviews to understand how the social determinants of health were modified by critical illness.
- Utilised replicable, rigorous qualitative methods, it suggests a complex interplay between the social determinants of health and recovery from critical illness.
- Although the sample size is considerable for a qualitative study, we recognize that we have utilised a convenience sample, with a small portion of all critical care survivors in these countries.

## Introduction

The Social determinants of health (SDoH) are the non-medical factors which influence health outcomes and include both upstream policy, environmental, and context factors and their manifestations in terms of individual material and social hardship(1). There has been a growing realization of their central role in shaping the capacity of individuals to not only access high quality care, but also to benefit from such care(2). In some discussions, particularly around the role of SDoH impacting outcomes from acute illness and hospitalization, such factors are conceptualized as causally antecedent to medical care and illness.

Illness can itself result in material and social hardship, opening the possibility of a bidirectional relationship(3). Financial toxicity resulting from oncologic care has been documented and is also found after surgery and respiratory failure(4, 5). Adverse employment outcomes are common after acute myocardial infarction, stroke, and critical illness(6-8). While changes in individual economic and social situations may be exacerbated by gaps in the U.S. social safety net, many have been documented throughout the industrialized world(9).

Within the critical care context, more detailed evidence is emerging about the potential interaction between SDoH and recovery. For example, a recent multi-centre study from the US revealed that social isolation was a risk factors for poor outcomes (mortality) among older adults surviving critical illness (10). Similarly, in the UK, recent data has shown that almost one third of participants requested a social and welfare consultation during an ICU recovery clinic, in order to alleviate ongoing welfare and social issues (11). However, a full and systematic understanding of the challenges survivors face, alongside how critical illness may worsen SDoH, is lacking.

The objective of this study, therefore, was to identify SDoH that were modified at the individual level by the experience of critical illness, and the effect of such modifications on patients' and families'

1  
2  
3 recovery. We conducted an international qualitative study of the experience of recovery from critical  
4  
5 illness with patients and caregivers from 14 different hospitals across Australia, the US, and the UK.  
6  
7 We deliberately recruited patients from three different countries to ensure that any international  
8  
9 differences in social contexts and recovery could be delineated. The social context in each country  
10  
11 and indeed the healthcare systems are different. The US, for example, has an insurance-based  
12  
13 healthcare system, whereas the UK has a National Healthcare system and Australia a mixture of both.  
14  
15 By including these diverse approaches to healthcare delivery, we could understand the international  
16  
17 context better.  
18  
19  
20  
21  
22  
23  
24  
25  
26  
27  
28  
29  
30  
31  
32  
33  
34  
35  
36  
37  
38  
39  
40  
41  
42  
43  
44  
45  
46  
47  
48  
49  
50  
51  
52  
53  
54  
55  
56  
57  
58  
59  
60

## Methods

### *Design and Setting*

We utilised a qualitative, descriptive design. Sites participating in the Society of Critical Care Medicine's (SCCM) THRIVE programme (12) offered Intensive Care Unit (ICU) recovery programmes in the form of post-ICU clinics and peer support programmes. Patients who had not received any specific intervention were also interviewed (**Table 1**).

The THRIVE programme was a programme of work run via the SCCM for five years (2015-2019). It actively recruited hospitals internationally to work with the Society to support innovation in the field of ICU recovery up until 2019. It ran two collaboratives: peer support and post-ICU clinics. We invited sites to take part in this programme of work from these two collaboratives. All sites in the initial recruitment waves (2015, 2016) were from Australia, US and the UK, with the majority of sites from the US.

We chose to undertake interviews internationally, in three developed nations, where the social context for support and health needs could be fully understood. The purpose of this, was to understand if different developed healthcare systems supported care in diverse ways. The sample size was decided upon through analysing previous research in the field and through iterative discussions with the research team. This approach was taken across the entire sample and not a site level. The numbers of patients included in the final sample was based on the number of THRIVE sites in each country. Not all THRIVE sites were able to be involved in the research process due to staffing limitations and access to research support at these institutions.

All Patients attending ICU recovery programmes were invited by professionals at each site if they met:

- i) Inclusion criteria - English-speaking patients older than 18 years admitted to the ICU, or caregiver of a patient who survived critical illness; and not
- ii) Exclusion criteria - ongoing severe neurological

1  
2  
3 and/or cognitive impairment or continued inpatient care in hospital or rehabilitation. Informed  
4 consent was obtained before each interview.  
5  
6  
7  
8  
9

#### 10 *Data collection*

11  
12 Data were collected through in-depth semi-structured scripted interviews via telephone. Separate  
13 questions were used for caregivers and patients; these were adapted for those who did not receive a  
14 post critical illness intervention (**S1**). Questions were generated from previous literature and through  
15 iterative discussion within the research group (JMCP, LB, KJH, CMS). All researchers, alongside patient  
16 representatives, discussed the interview script to ensure consistency. Some interviewers were known  
17 to the participants through their role in direct clinical care. Data were audio-recorded and transcribed  
18 verbatim.  
19  
20  
21  
22  
23  
24  
25  
26  
27  
28  
29

#### 30 *Data Analyses*

31  
32 We sought to understand how SDoH were potentially modified at the individual level by the  
33 experience of critical illness, and the effect of such modifications on recovery. To do so, we  
34 systematically mapped our analysis against a set of pre-defined concepts related to SDoH, adapted  
35 from a public policy framework(13), including: money and work; education and skills; housing  
36 transportation and neighbourhoods; and family, friends and social connections. In this analysis, we  
37 defined a 'rural' setting as a located out with a main town or city.  
38  
39  
40  
41  
42  
43  
44  
45  
46  
47

48 The Framework Analysis technique was used to analyze data across these concepts(14) , through  
49 seven stages: 1) Transcription; 2) Familiarization with the interview; 3) Coding; 4) Developing a  
50 working analytical framework; 5) Applying the analytical framework; 6) Charting data into the  
51 framework matrix; 7) Interpreting the data(11). This analytical framework is widely used in critical care  
52 research and allows structured and systematic analysis of qualitative data(15, 16). Three researchers  
53 (JMCP, LB, JMCC) independently undertook preliminary sweeps of the data. Key quotes to support the  
54  
55  
56  
57  
58  
59  
60



1  
2  
3 findings were then independently extracted by JMcP and JMcC. Member checking with a small  
4 number of interview participants was undertaken pre and post analysis to enhance rigour of the  
5 reported results. Member checking, also known as participant or respondent validation, is a technique  
6 for exploring the credibility of results. Data or results are returned to participants to check for accuracy  
7 and resonance with their experiences(17). Participants who had agreed to ongoing contact with the  
8 research team were involved in the member checking process. The Consolidated Reporting of  
9 Qualitative Research (COREQ) checklist was used for this study(18).  
10  
11  
12  
13  
14  
15  
16  
17  
18  
19  
20

### 21 *Patient and Public Involvement*

22  
23 Patients and caregivers who had previously been admitted to intensive care helped create the  
24 interview schedules utilised for this study. These representatives helped developed question content  
25 and structure via iterative discussion with the research team. These individuals had been part of ICU  
26 follow-up services previously; they were known to staff involved in the research and had given  
27 permission to be contacted about involvement such as this. They also supported the planning of the  
28 study conduct and reviewed all study documentation.  
29  
30  
31  
32  
33  
34  
35  
36  
37

### 38 *Permissions*

39  
40 Study design and protocol were approved by the Western Health Low Risk Human Research Ethics  
41 Panel (Australia, Ref: HREC/17/WH/170); Vanderbilt University Institutional Review Board (US  
42 coordinating site, Ref: 171299); and the Southwest (Cornwall and Plymouth, Ref: 18/SW/0137)  
43 Research Ethics Committee (UK). Written consent was obtained from participants.  
44  
45  
46  
47  
48  
49  
50  
51  
52  
53  
54  
55  
56  
57  
58  
59  
60

## Results

Across 14 sites, interviews were completed with 66 patients and 20 caregivers from Australia, the US, and the UK (**Table 1**). Interviews took place between July 2018 and February 2019. We analysed the data across four main domains of SDoH: money and work; education and skills; housing transportation and neighbourhoods; and family, friends and social connections. We have presented each SDoH as an individual category, however, how this particular category of SDoH influenced outcomes and indeed other SDoH are also explored. Supporting quotes, illustrating these concepts can be found in

**Table 2.**

For peer review only

| <b>Demographic</b>                               | <b>Patients (n=66)</b> | <b>Caregivers (n=20)</b> |
|--------------------------------------------------|------------------------|--------------------------|
| Age (years), Median (IQR)                        | 52 (40-62.5)           | 52 (46-67)               |
| Gender, n male (%)                               | 26 (39.4)              | 3 (15)                   |
| <b>Patient Admission Diagnosis n (%)</b>         |                        |                          |
| Sepsis                                           | 28 (42.4)              |                          |
| Respiratory Failure                              | 15 (22.8)              |                          |
| Post GI Surgery                                  | 5 (7.6)                |                          |
| Trauma                                           | 2 (3)                  |                          |
| Other                                            | 16 (24.2)              |                          |
| <b>Ventilated, n (%)</b>                         |                        |                          |
| Yes                                              | 57 (86.4)              |                          |
| No                                               | 9 (13.6)               |                          |
| <b>Length of time since ICU discharge, n (%)</b> |                        |                          |
| <6 months                                        | 15 (22.8)              |                          |
| 7-11 months                                      | 9 (13.6)               |                          |
| 1-2 years                                        | 12 (18.2)              |                          |
| 2-5 years                                        | 22 (33.3)              |                          |
| >5 years                                         | 8 (12.1)               |                          |
| <b>Relationship to the patient, n (%)</b>        |                        |                          |
| Spouse/Significant other                         |                        | 10 (50)                  |
| Parent                                           |                        | 5 (25)                   |
| Sibling                                          |                        | 3 (15)                   |
| Child                                            |                        | 2 (10)                   |
| <b>Nationality, n (%)</b>                        |                        |                          |
| United States                                    | 50 (75.7)              | 16 (80)                  |
| UK                                               | 13 (19.7)              | 2 (10)                   |
| Australia                                        | 3 (4.6)                | 2 (10)                   |
| <b>Participated in recovery programme, n (%)</b> |                        |                          |
| Yes                                              | 52 (79)                | 11 (55)                  |
| No                                               | 14 (21)                | 9 (45)                   |

**Table One: Participant Demographics**

### Money and work

Loss of both money and work following critical illness was discussed frequently across the interviews.

For example, a patient from Australia described how their new critical illness disability had changed their employment status:

*'I come home and now you've lost your job and you can't work and then the realisation that you are on oxygen for the rest of your life.'*

Job loss and change had a direct negative impact on income, access to care and subsequent recovery from critical illness. For example, one patient of the loss of not only insurance but also savings during critical illness and the recovery period following forced unemployment:

*'For the first surgery I had two insurances.. second surgery, my school, they were nice enough to keep me on there, but then I lost it because I wasn't working.... We had a little savings, but that's all gone, because we have had to use it for medical bills and driving to the hospital an hour and a half.'*

There were health-related consequences of the changes. For example, participants described how they could no longer afford the treatments necessary for recovery:

| Social Determinant of Health Modification         | Illustrative Quote                                                                                                                                                                                                                                                                                                                                                                                                                                                                                                                                                                                                                                                                                                                                                                                                                                                                                                                                                                                                                                                                                                                                                                                                                                                                                                                                                                                                                                                                                                                                                                                                                                                                                                                                                                                  |
|---------------------------------------------------|-----------------------------------------------------------------------------------------------------------------------------------------------------------------------------------------------------------------------------------------------------------------------------------------------------------------------------------------------------------------------------------------------------------------------------------------------------------------------------------------------------------------------------------------------------------------------------------------------------------------------------------------------------------------------------------------------------------------------------------------------------------------------------------------------------------------------------------------------------------------------------------------------------------------------------------------------------------------------------------------------------------------------------------------------------------------------------------------------------------------------------------------------------------------------------------------------------------------------------------------------------------------------------------------------------------------------------------------------------------------------------------------------------------------------------------------------------------------------------------------------------------------------------------------------------------------------------------------------------------------------------------------------------------------------------------------------------------------------------------------------------------------------------------------------------|
| <b>Family, Friends and Social Connections</b>     | <p>'I went back to my daughters and I stayed there for a while. I relaxed and um I did relax...I had my grandchildren around me who I think are one of the best healer's um because just being with them makes me feel erm good...'</p> <p>'God has helped me through the ministry...for 50 years we were pastors. Knowing and seeing how he has worked with other people in their lives, I think has given me the experiences to know that' hey you don't have to do this by yourself'.</p> <p>'Our friends all disappeared. ...I'm not who I was before. I think that, for most people, they couldn't deal with it. And so our community just sort of vanished.</p> <p>"I would feel better and I wouldn't feel so alone with all of this. Because while my family was supportive, they reached a point where they didn't want to talk about it. They didn't want to relive it."</p>                                                                                                                                                                                                                                                                                                                                                                                                                                                                                                                                                                                                                                                                                                                                                                                                                                                                                                              |
| <b>Money and Work</b>                             | <p>'Financially...for the first surgery I had two insurances, mine and my husband. Second surgery, my school, they were nice enough to keep me on there, but then I lost it, because I wasn't working. Financially, if its less than a year you've got deductibles. There's no plan that helps people that are working...if we were very, very poor, or very, very rich, but there's nothing that helps you in the middle. There isn't.... We had a little bit of savings, but that's all gone, because we've had to use it medical bills, and driving to the hospital an hour and a half.'</p> <p>'Whether you know when he came home, whether the house had to be reconfigured for a wheelchair or anything like that- that was another challenge not knowing as well, financial circumstances that's another challenge you know- he's out of work he was a breadwinner and now he's not sort of thing and who do we rely, what do we do, and everything like that- that's a big issue I think with everyone who is sick I suppose. '</p> <p>'I would say being able to get back into the field of work and build relationships and actually function....I just felt worthless, because without your money...We associate money with the ability to educate or be educated. There's no secret'.</p> <p>'I think it's changing the paradigm from thinking that ICU is the endpoint...with medicine the way it is, it isn't the next step to the funeral home necessarily...these people are surviving. They're not perishing.... it's affected every aspect of a person's family life. And often it's affecting their money. And things that are big, that are really going to impact them, and I don't think people realize. I think there just needs to be a better support system in place.</p> |
| <b>Skills and Education</b>                       | <p>'I was fully able to read small things in neurological journals. My husbands a physician, so I would take whatever passwords he had to things so I could get to the journals that normally lay pay can't get into them.'</p> <p>'I think that the other thing that's helped us do well is just some of the personal tools we have. We're not ashamed to ask or accept help, or to ask a question, or to be kind of vulnerable... some of that has to do with our education, like we're both very resourceful.... I can see if you've maybe poorly educated, I can see if you lived in a world where people haven't been trustworthy, so you don't trust people, I can see if we had different life experience, it could just look a lot differently.'</p>                                                                                                                                                                                                                                                                                                                                                                                                                                                                                                                                                                                                                                                                                                                                                                                                                                                                                                                                                                                                                                        |
| <b>Housing, Transportation and Neighbourhoods</b> | <p>'What I did, when I got back home, the only place I could sleep for a while was the recliner. I could not lay down on our bed.'</p> <p>'Now our hospital in (geographical area name) its good for a band-aid. If you have anything else wrong with you, you do not want to go there.'</p> <p>'I wanted to give back..... it would be easy for me not to go, because it's a long distance and its kind of a hassle to get up there.'</p>                                                                                                                                                                                                                                                                                                                                                                                                                                                                                                                                                                                                                                                                                                                                                                                                                                                                                                                                                                                                                                                                                                                                                                                                                                                                                                                                                          |

**Table 2: Modification of the SDoH at the individual level and potential effects of such modifications on recovery from critical illness**

1  
2  
3 *'my insurance company is messing with me right now... I'm out of my medicine. I'm out of one of them.*  
4  
5 *I called to see how much it was and I can't afford that. They want \$55 for seven days. I can't afford*  
6  
7 *that.'*  
8  
9

10  
11  
12 Participants discussed how these changes to money and work were a direct mechanism for mental  
13  
14 health problems. One participant from the US spoke about how changes to her health insurance had  
15  
16 increased feelings of anxiety:  
17

18  
19  
20  
21 *'There was an issue with the insurance....the first time said they weren't going to cover any of our*  
22  
23 *hospital bills. You can imagine... 'We're going to lose our house, oh my God...' The anxiety of it all. ....'*  
24  
25

26  
27  
28 A participant from the UK discussed changes to her employment situation following critical illness  
29  
30 and subsequent emotional disruption:  
31

32  
33  
34 *'I've changed jobs, I was a teacher before, but now I've gone into office work and I'm still trying to*  
35  
36 *adjust. My GP wrote a letter saying I wasn't fit to go back to teaching because of the kind of asthma*  
37  
38 *I've got...At the time I was devastated, I was really, really devastated.'*  
39  
40  
41

42  
43  
44 Caregivers suffered similar loss of money and work, albeit via different mechanisms. One participant  
45  
46 (patient) spoke about how their partner had lost their job due to new/increased caregiving  
47  
48 responsibilities following hospital discharge:  
49  
50

51  
52  
53 *'I was working when I went in, and so was she and she had to take time off from work, and they had*  
54  
55 *let her go from work, after she wasn't making her units, and it made it rough on us.'*  
56  
57  
58  
59  
60

### Skills and Education

The increased disability caused by critical illness resulted in an inability to return previous roles and activities. One participant, who had a highly skilled role, described the impact of cognitive disability on function:

*'My brain's just not making the connection...I'm retired but I was a judge and for a long time I wouldn't go back to court.... I can tell my brain is not making the connection.'*

Similarly, a participant who had been in a skilled academic role could no longer return to their previous appointment, because of critical illness-caused cognitive decline:

*'My identity was a writer and professor had been built around being smart and so those issues manifested themselves as word finding, executive functioning...I couldn't go back to work though. I was having cognitive difficulties...my request to have support for my particular cognitive deficits has been denied.'*

Such loss of skills required survivors to re-evaluate future career and employment prospects. One younger participant spoke of having to change educational pathways:

*'it's changed my career path. I'm only 20...I just turned 21. And so I'm still really young. I'm in college. I changed my major because of it.'*

### Housing, Transportation, and Neighbourhoods

New critical illness related disability significantly disrupted housing, transportation and residency in those survivors interviewed. Patients needed to move house due to physical inability:

1  
2  
3 *"It took, again, a lot of coordination and a lot of....Everyone pitched in...but it did provide a lot of stress,*  
4 *just in managing food and managing cleaning, and all the little things that you have to do from day to*  
5 *day. One of the reasons we began looking to move...having such a large house was a big struggle for*  
6 *her. Even going up and down stairs."*  
7  
8  
9  
10  
11  
12  
13

14 A participant from Australia spoke about the challenges to find funding for the housing adaptations  
15 which were required following critical illness and the financial and emotional stress this caused:  
16  
17

18  
19  
20  
21 *'when he came home whether the house had to be reconfigured for a wheelchair or anything like*  
22 *that...the financial circumstances that's another challenge... he was a breadwinner and now he's not*  
23 *and who de we rely, what do we do?'*  
24  
25  
26  
27  
28  
29

30 The burden of transportation rose for survivors, who now needed to attend more medical  
31 appointments. Yet many critical illness survivors could no longer drive, so this ongoing health burden  
32 caused disruption for the entire family unit:  
33  
34  
35

36  
37  
38  
39 *'It wasn't necessarily one doctor's appointment that stood out, but it was the fact that there were so*  
40 *many of them, and I think it was so significant because we had to drive an hour each way to get there.'*  
41  
42  
43  
44  
45

46 These changes influenced recovery for many, especially for those living in rural areas, as accessing  
47 appropriate and reliable healthcare became harder:  
48  
49

50  
51 *'I mean around here you're not going to find any medical help that's going to be decent. We're just*  
52 *so far removed from everything....quite a disadvantage of being so far away from everything.'*  
53  
54  
55  
56  
57  
58  
59  
60



1  
2  
3 Changes to how participants could access transport also had a direct impact on recovery. For example,  
4  
5 one participant spoke about how their inability to drive led to feelings of isolation:  
6  
7  
8  
9

10 *'I couldn't drive for quite a long time, so I felt fairly dependent, I felt pretty trapped in.'*  
11  
12  
13

#### 14 **Family, Friends and Social connections**

15  
16 Critical illness changed survivors' social networks and relationships within families. For example,  
17  
18 participants spoke about the negative impact of physical and emotional changes on wider social  
19  
20 networks:  
21  
22  
23  
24

25 *'and so our community sort of vanished... I still have these huge scars and I'm not who I was before. I*  
26  
27 *think for most people, they couldn't deal with it.'*  
28  
29  
30

31  
32 Critical illness also led to fractures in family networks. In some cases, families struggled to manage the  
33  
34 enormity of the situation, which led to challenges during recovery. For example, one survivor from  
35  
36 the UK highlighted the impact which it had on the family unit:  
37  
38  
39  
40

41 *'I was doing something in the kitchen, and I couldn't do it and I ended up smashing stuff all over the*  
42  
43 *kitchen and my brother came in and I started shouting at him, saying you know this is my life?'*  
44  
45  
46  
47

48 These changes had consequences during recovery. Participants described isolation, challenges re-  
49  
50 engaging with activities of daily living, and mental health problems related to these changes. A  
51  
52 participant from the US described how these changes had impacted their mental health and  
53  
54 behaviour:  
55  
56  
57  
58  
59  
60

1  
2  
3 *'No one talked to me about how I might be when I get home, like emotionally...I react to things... I feel*  
4 *bad 'cause its like hell for my family. I have these... I can't control them...just absolute fits of anger and*  
5 *rage... and just crying.'*  
6  
7  
8  
9  
10  
11  
12  
13  
14  
15  
16  
17  
18  
19  
20  
21  
22  
23  
24  
25  
26  
27  
28  
29  
30  
31  
32  
33  
34  
35  
36  
37  
38  
39  
40  
41  
42  
43  
44  
45  
46  
47  
48  
49  
50  
51  
52  
53  
54  
55  
56  
57  
58  
59  
60

For peer review only

## Discussion

This international, multi-centre study suggests a complex interplay between SDoH and recovery from critical illness. It is already well-established that upstream policy and contextual factors, as well as individual hardship, are associated with worsened onset of critical illness and outcomes; the early months of the COVID-19 epidemic particularly highlighted this(19). These qualitative results demonstrate how critical illness precipitated adverse changes in the recovery environment. These changes and other behavior changes resulted in lost connections with family and social support, loss of the instrumental, social, and psychological benefits of work, and having numerous other practical difficulties. Together these changes impeded successful access to and benefit from even traditional health services. Our findings provide evidence that the relationship between social determinants and recovery plays out across multiple domains of SDoH and recovery, as well as bi-directionally. Further, they demonstrate that the “social determinants of recovery” are not fixed nor the same as patients’ pre-illness statuses, suggesting a need to assess these mechanisms, and their impact, across time.

These findings can be situated in a broader body of work that suggests their generalizability. Inadequacies of the U.S. health and social safety net are well-described, but it is notable that the data for this study also included examples from Australia and the United Kingdom. Loss of employment and/or financial hardship after AMI, acute respiratory distress syndrome, or traumatic injury are not uncommon(6, 20, 21). Studies have likewise found many suffer from significant financial costs and related material hardship due to chronic and ongoing illness, such as cancer(22) and heart disease(23).

Some, but not all, of the difficulties here seem to be a failure of the insurance functions of existing organizational arrangements to buffer patients and their families against purely financial shocks of critical illness. This interpretation is reinforced by findings that specifically financial stress is central after acute respiratory failure(5), as well as work on surprise billing(24) and risk for high bills after surgery(25), or decades-old findings about patients self-management of diabetes in the presence of

1  
2  
3 cost concerns(26). Additionally, substantial evidence supports our findings that critical illness leads to  
4 other financial hardship through job loss, unpaid family caregiving, and new nonmedical expenses due  
5 to new disability(4, 7, 27). Moreover, recent data from the UK suggest that patients who have ongoing  
6 disability due to critical illness, are more likely to require government funded welfare support in the  
7 years following discharge, in comparison to contemporary hospital controls(28); concerns are  
8 emerging about COVID-19 patients(29, 30).  
9

10  
11  
12 Efforts to address these resulting financial hardships through direct payments to patients and  
13 caregivers have shown promise; the Medicaid Cash and Counseling program found improved patient  
14 and caregiver wellbeing alongside improved health outcomes(31, 32). Similarly, the US Department  
15 of Veteran Affairs' Program of Comprehensive Assistance to Family Caregivers suggests financial  
16 support provides crucial assistance in varied ways, depending on specific needs(33). In the UK, efforts  
17 to include social welfare consultation as part of critical illness recovery programs have also shown  
18 promise(11). These issues may become more prominent as moves to telehealth and remote  
19 monitoring require patients to bring more of their own technology to fully access services, potentially  
20 exacerbating inequities(34, 35).  
21  
22  
23  
24  
25  
26  
27  
28  
29  
30  
31  
32  
33  
34  
35  
36  
37  
38  
39  
40

41 Other challenges do not appear to be purely financial and would not be remediated by even  
42 theoretically complete insurance against total healthcare costs. Particularly prominent are the  
43 impacts of critical illness on social isolation. Social isolation is not benign; the influence of social  
44 relationships and social isolation on mortality is comparable to smoking, obesity and alcohol(36).  
45 initiatives across the UK and the US have successfully introduced innovation to support social isolation.  
46 For example, in Chicago, one health system added a social connection question to a pre-existing health  
47 screening tool, alongside care pathways such a friendly caller initiative to promote community  
48 socialisation during the COVID-19 pandemic(37). Peer support programmes which link individuals  
49 who have had similar healthcare experiences may also be advantageous, with evidence suggesting  
50  
51  
52  
53  
54  
55  
56  
57  
58  
59  
60

1  
2  
3 peer support could be a mechanism for reducing social isolation and improving global mental  
4  
5 health(16).  
6  
7  
8  
9

10 These data in the context of emerging literature have implications for clinicians and health systems  
11 seeking to promote full recovery of critically ill and other patients by addressing SDoH(38, 39). First,  
12 the data suggest that assessments of risk might include not just current hardship, but the extent to  
13 which the patients' reserves (broadly construed) are sufficient to prevent future hardship. It is unclear  
14 to what extent currently suggested patient-level risk assessments of SDoH(40, 41) are capable of  
15 predicting changes of the type these patients described. Second, given the myriad ways in which SDoH  
16 impacted each other following critical illness, understanding the impact of post-illness interventions  
17 (or lack thereof) must also be scrutinized across multiple domains, understanding that positive and  
18 negative consequences may be different for each patient. Certainly, targeted interventions to assure  
19 access to follow-up care, such as transportation support (e.g., Uber or Lyft vouchers) or telehealth  
20 support (e.g., device provision and training) can address some impacts. However, the multi-faceted  
21 and interactive results of our study also suggest that broader programs of direct assistance after  
22 critical illness, which address financial and non-financial resources, should be explored and potentially  
23 advocated for.  
24  
25  
26  
27  
28  
29  
30  
31  
32  
33  
34  
35  
36  
37  
38  
39  
40  
41  
42  
43

#### 44 *Limitations*

45 Strengths of this study include its international, multicenter approach to understanding the interplay  
46 between SDoH and recovery from critical illness. However, although the sample size is considerable  
47 for a qualitative study, we recognize that we have utilised a convenience sample, with a small portion  
48 of all critical care survivors in these countries. The sample size was not uniform across the three  
49 countries involved, which may have also influenced the reported results. We also do not have detailed  
50 in-hospital information for each patient.  
51  
52  
53  
54  
55  
56  
57  
58  
59  
60

1  
2  
3 We acknowledge that the primary aim of these interviews was not to delineate the socio-economic  
4 problems which participants faced during recovery from critical illness. As such, important concepts  
5 may have been missed in this analysis. For example, we did not find cross-country differences; this  
6 is an important construct which could have been missed. Finally, we have used a broad definition of  
7 the term 'rural' in this analysis to ensure that it is applicable internationally. However, there are  
8 international variances in rural and urban interfaces, as such we may be under or over reporting this  
9 as an issue.  
10  
11  
12  
13  
14  
15  
16  
17  
18  
19  
20

## 21 **Conclusion**

22  
23 In conclusion, this international, multi-center study has explored how critical illness changes social  
24 circumstances, impacting recovery and health. Our findings suggest that increased attention to issues  
25 such as one's social network, economic security, education and skills, access to healthcare, and living  
26 environment are required following critical care discharge. Targeting interventions toward these  
27 domains, including specific emphasis on social support and education, could potentially improve  
28 outcomes.  
29  
30  
31  
32  
33  
34  
35  
36  
37  
38  
39  
40  
41  
42  
43  
44  
45  
46  
47  
48  
49  
50  
51  
52  
53  
54  
55  
56  
57  
58  
59  
60

**Ethics and consent to participate:**

The study design and protocol were approved by the Western Health Low Risk Human Research Ethics Panel (Australia, Ref: HREC/17/WH/170); the Vanderbilt University Institutional Review Board (US coordinating site, Ref: 171299); and the Southwest (Cornwall and Plymouth, Ref: 18/SW/0137) Research Ethics Committee (UK). All participants provided informed consent.

**Consent for publication:**

N/A

**Availability of data:**

The dataset used is available on reasonable request from the corresponding author.

**Competing Interests:**

No conflicts of interest declared by other authors.

**Sources of Funding:** K Haines, J McPeake, L Boehm, C Sevin and Tara Quasim received funding from SCCM to undertake this work (NO AWARD NUMBER). L Boehm is funded by NIH/NHLBI (K12 HL137943) as is T J Iwashyna (K12 HL138039). J McPeake is funded by a THIS.Institute (University of Cambridge) Fellowship (PD- 2019-02-16/307748-01).

**Author Contribution:**

Conception and design: JMCP, CMS, KJH, TJI, MEM

Data Extraction and Primary Analysis: JMCP, KH, CMS, TJI and LB

Analysis and interpretation: LB, JMCP, TJI

Reporting, drafting and revising the manuscript for important intellectual content: JMCP, CMS, KJH, TJI, MEM, LB, EH, KH, RB, AB, BB, TE, WH, AH, JJ, AJ, JK, KK, JMCC, JM, AMY, TQ, AS, DW, MS, GN, ROH,

**Role of the funder:** This analysis was funded by the Society of Critical Care Medicine (SCCM). The scientific questions, analytic framework, data collection, and analysis were undertaken independently of the funder. The SCCM Council reviewed the manuscript and offered input prior to finalization.

**Acknowledgements:** The authors would like to acknowledge the funders for their support.

**Figure and Table Legends:**

Table One: Participant Demographics

Table 2: Modification of SDoH at the individual level and potential effects of such modifications on recovery from critical illness.

## References

1. Byhoff E, Kangovi S, Berkowitz SA, DeCamp M, Dzung E, Earnest M, et al. A Society of General Internal Medicine Position Statement on the Internists' Role in Social Determinants of Health. *Journal of General Internal Medicine*. 2020;35(9):2721-7.
2. Butler SM. What is the Outlook for Addressing Social Determinants of Health? *JAMA Health Forum*. 2021;2(9):e213639-e.
3. Mendes de Leon CF, Griggs JJ. Medical Debt as a Social Determinant of Health. *JAMA*. 2021;326(3):228-9.
4. Hauschildt KE, Seigworth C, Kamphuis LA, Hough CL, Moss M, McPeake JM, et al. Financial Toxicity After Acute Respiratory Distress Syndrome: A National Qualitative Cohort Study. *Crit Care Med*. 2020;48(8):1103-10.
5. Khandelwal N, Hough CL, Downey L, Engelberg RA, Carson SS, White DB, et al. Prevalence, Risk Factors, and Outcomes of Financial Stress in Survivors of Critical Illness. *Crit Care Med*. 2018;46(6):e530-e9.
6. Kamdar BB, Huang M, Dinglas VD, Colantuoni E, Wachter TMv, Hopkins RO, et al. Joblessness and Lost Earnings after Acute Respiratory Distress Syndrome in a 1-Year National Multicenter Study. *Am J Respir Crit Care Med*. 2017;196(8):1012-20.
7. McPeake J, Mikkelsen ME, Quasim T, Hibbert E, Cannon P, Shaw M, et al. Return to Employment after Critical Illness and Its Association with Psychosocial Outcomes. A Systematic Review and Meta-Analysis. *Ann Am Thorac Soc*. 2019;16(10):1304-11.
8. Garland A, Jeon S-H, Stepner M, Rotermann M, Fransoo R, Wunsch H, et al. Effects of cardiovascular and cerebrovascular health events on work and earnings: a population-based retrospective cohort study. *Canadian Medical Association Journal*. 2019;191(1):E3-E10.
9. Paul C, Boyes A, Hall A, Bisquera A, Miller A, O'Brien L. The impact of cancer diagnosis and treatment on employment, income, treatment decisions and financial assistance and their relationship to socioeconomic and disease factors. *Supportive Care in Cancer*. 2016;24(11):4739-46.
10. Falvey JR, Cohen AB, O'Leary JR, Leo-Summers L, Murphy TE, Ferrante LE. Association of Social Isolation With Disability Burden and 1-Year Mortality Among Older Adults With Critical Illness. *JAMA Internal Medicine*. 2021;181(11):1433-9.
11. McPeake JM, Henderson P, Darroch G, Iwashyna TJ, MacTavish P, Robinson C, et al. Social and economic problems of ICU survivors identified by a structured social welfare consultation. *Crit Care*. 2019;23(1):153.
12. McPeake J, Hirshberg EL, Christie LM, Drumright K, Haines K, Hough CL, et al. Models of Peer Support to Remediate Post-Intensive Care Syndrome: A Report Developed by the Society of Critical Care Medicine Thrive International Peer Support Collaborative. *Crit Care Med*. 2019;47(1):e21-e7.
13. Dodds S. Ten years of the Glasgow Centre for population Health: the evidence and implications. . In: Health GCfP, editor. Glasgow 2014
14. Gale NK, Heath G, Cameron E, Rashid S, Redwood S. Using the framework method for the analysis of qualitative data in multi-disciplinary health research. *BMC Medical Research Methodology*. 2013;13(1):117.
15. Haines KJ, Sevin CM, Hibbert E, Boehm LM, Aparanji K, Bakhru RN, et al. Key mechanisms by which post-ICU activities can improve in-ICU care: results of the international THRIVE collaboratives. *Intensive Care Med*. 2019;45(7):939-47.
16. McPeake J, Iwashyna TJ, Boehm LM, Hibbert E, Bakhru RN, Bastin AJ, et al. Benefits of Peer Support for Intensive Care Unit Survivors: Sharing Experiences, Care Debriefing, and Altruism. *American Journal of Critical Care*. 2021;30(2):145-9.



17. Birt L, Scott S, Cavers D, Campbell C, Walter F. Member Checking: A Tool to Enhance Trustworthiness or Merely a Nod to Validation? *Qualitative Health Research*. 2016;26(13):1802-11.
18. Tong A, Sainsbury P, Craig J. Consolidated criteria for reporting qualitative research (COREQ): a 32-item checklist for interviews and focus groups. *International Journal for Quality in Health Care*. 2007;19(6):349-57.
19. Lone NI, McPeake J, Stewart NI, Blayney MC, Seem RC, Donaldson L, et al. Influence of socioeconomic deprivation on interventions and outcomes for patients admitted with COVID-19 to critical care units in Scotland: A national cohort study. *The Lancet Regional Health – Europe*. 2021;1.
20. Warraich HJ, Kaltenbach LA, Fonarow GC, Peterson ED, Wang TY. Adverse Change in Employment Status After Acute Myocardial Infarction. *Circulation: Cardiovascular Quality and Outcomes*. 2018;11(6):e004528.
21. Murphy PB, Severance S, Savage S, Obeng-Gyasi S, Timsina LR, Zarzaur BL. Financial toxicity is associated with worse physical and emotional long-term outcomes after traumatic injury. *Journal of Trauma and Acute Care Surgery*. 2019;87(5):1189-96.
22. Zafar SY, Peppercorn JM, Schrag D, Taylor DH, Goetzinger AM, Zhong X, et al. The financial toxicity of cancer treatment: a pilot study assessing out-of-pocket expenses and the insured cancer patient's experience. *Oncologist*. 2013;18(4):381-90.
23. Valero-Elizondo J, Khera R, Saxena A, Grandhi GR, Virani SS, Butler J, et al. Financial Hardship From Medical Bills Among Nonelderly U.S. Adults With Atherosclerotic Cardiovascular Disease. *Journal of the American College of Cardiology*. 2019;73(6):727-32.
24. Chhabra KR, Sheetz KH, Nuliyalu U, Dekhne MS, Ryan AM, Dimick JB. Out-of-Network Bills for Privately Insured Patients Undergoing Elective Surgery With In-Network Primary Surgeons and Facilities. *JAMA*. 2020;323(6):538-47.
25. Scott JW, Raykar NP, Rose JA, Tsai TC, Zogg CK, Haider AH, et al. Cured into Destitution: Catastrophic Health Expenditure Risk Among Uninsured Trauma Patients in the United States. *Ann Surg*. 2018;267(6):1093-9.
26. Piette JD, Heisler M, Wagner TH. Cost-related medication underuse among chronically ill adults: the treatments people forgo, how often, and who is at risk. *Am J Public Health*. 2004;94(10):1782-7.
27. Griffiths J, Hatch RA, Bishop J, Morgan K, Jenkinson C, Cuthbertson BH, et al. An exploration of social and economic outcome and associated health-related quality of life after critical illness in general intensive care unit survivors: a 12-month follow-up study. *Crit Care*. 2013;17(3):R100.
28. McPeake J, Iwashyna TJ, Henderson P, Leyland AH, Mackay D, Quasim T, et al. Long term outcomes following critical care hospital admission: A prospective cohort study of UK biobank participants. *The Lancet Regional Health – Europe*. 2021;6.
29. Donnelly JP, Wang XQ, Iwashyna TJ, Prescott HC. Readmission and Death After Initial Hospital Discharge Among Patients With COVID-19 in a Large Multihospital System. *JAMA*. 2021;325(3):304-6.
30. Iwashyna TJ, Kamphuis LA, Gundel SJ, Hope AA, Jolley S, Admon AJ, et al. Continuing Cardiopulmonary Symptoms, Disability, and Financial Toxicity 1 Month After Hospitalization for Third-Wave COVID-19: Early Results From a US Nationwide Cohort. *J Hosp Med*. 2021.
31. Carlson BL, Foster L, Dale SB, Brown R. Effects of Cash and Counseling on personal care and well-being. *Health Serv Res*. 2007;42(1 Pt 2):467-87.

- 1  
2  
3 32. Coe NB, Guo J, Konetzka RT, Van Houtven CH. What is the marginal benefit of  
4 payment-induced family care? Impact on Medicaid spending and health of care recipients.  
5 Health Econ. 2019;28(5):678-92.  
6  
7 33. Sperber Nea. Family caregiver use and value of support services  
8  
9 in the VA Program of Comprehensive Assistance  
10  
11 for Family Caregivers. Journal of long-term care 2018 41-50.  
12 34. VanderBeek BL. Telemedicine and the Exacerbation of Health Care Disparities. JAMA  
13 Ophthalmology. 2021.  
14 35. Lyles CR, Wachter RM, Sarkar U. Focusing on Digital Health Equity. JAMA. 2021.  
15 36. Holt-Lunstad J, Smith TB, Baker M, Harris T, Stephenson D. Loneliness and social  
16 isolation as risk factors for mortality: a meta-analytic review. Perspect Psychol Sci.  
17 2015;10(2):227-37.  
18  
19 37. Escalante E, Golden RL, Mason DJ. Social Isolation and Loneliness: Imperatives for  
20 Health Care in a Post-COVID World. JAMA. 2021;325(6):520-1.  
21 38. Falvey JR, Murphy TE, Leo-Summers L, Gill TM, Ferrante LE. Neighborhood  
22 Socioeconomic Disadvantage and Disability After Critical Illness. Crit Care Med. 9000.  
23 39. Bastian K, Hollinger A, Mebazaa A, Azoulay E, Féliot E, Chevreur K, et al. Association  
24 of social deprivation with 1-year outcome of ICU survivors: results from the FROG-ICU study.  
25 Intensive Care Med. 2018;44(12):2025-37.  
26  
27 40. Moscrop A, Ziebland S, Bloch G, Iraola JR. If social determinants of health are so  
28 important, shouldn't we ask patients about them? BMJ. 2020;371:m4150.  
29 41. A Review of Tools to Screen for Social Determinants of Health in the United States: A  
30 Practice Brief. Population Health Management. 2020;23(6):422-9.  
31  
32  
33  
34  
35  
36  
37  
38  
39  
40  
41  
42  
43  
44  
45  
46  
47  
48  
49  
50  
51  
52  
53  
54  
55  
56  
57  
58  
59  
60

### **Supplemental File 1: Patient Interview Schedule**

1. Can you tell me about the how you have been getting on since you left hospital?
2. Thinking back to what you recall of your time in ICU, and then walking through your recovery from hospital to home to now – what were the most important moments for you? What stands out the most to you?
3. Thinking about this time from ICU to home, what were some of the challenges you encountered along the way?
4. How did you try and solve some of these challenges?
5. Can you describe any successful parts of your recovery
6. Thinking about your involvement in the ICU recovery programme, how did you feel when you received the invitation to take part?
7. What motivated you to participate? Why do you think you were able to participate at the time you did?
8. How did you feel when you first went to the program? Did that experience change over time?
9. How has the programme influenced your recovery?
10. Has anyone commented on changes which they have seen in you, if so what have they said?
11. What do you think are the most important parts of a support programme?
12. How could we better support patients and their families following discharge from ICU?
13. If another patient was thinking about participating in such a programme, what would you say to them?
14. Is there anything else you would like to add or ask?

### **Informal Caregiver Interview Schedule**

1. Can you tell me about how you have been getting on since your loved one left hospital?
2. Thinking back to what you remember about being in the ICU, and then the recovery period through to now – what were the most important moments for you? What stands out the most to you?
3. Thinking about this time, what were some of the challenges you encountered along the way?
4. How did you try and solve some of these challenges?
5. What were some of your greatest successes as your provided support to your loved one?
6. Thinking about your involvement in the program (quote relevant program), how did you feel when you received the invitation to join this program?
7. What motivated you to participate? What made it possible for you to participate when you did?

- 1
- 2
- 3 8. How did you feel when you first went to the program? How did that experience change over time?
- 4
- 5 9. How has the program influenced your experience as a caregiver following ICU?
- 6
- 7 10. What do you think are the most important parts of a support program from ICU discharge to post-
- 8 hospital?
- 9
- 10 11. How could we better support patients and their caregivers following discharge from ICU? 12. Can
- 11 you describe what you think would help people cope better with recovery after being in ICU?
- 12
- 13 13. Is there anything else you would like to add or ask?
- 14
- 15
- 16
- 17
- 18
- 19
- 20
- 21
- 22
- 23
- 24
- 25
- 26
- 27
- 28
- 29
- 30
- 31
- 32
- 33
- 34
- 35
- 36
- 37
- 38
- 39
- 40
- 41
- 42
- 43
- 44
- 45
- 46
- 47
- 48
- 49
- 50
- 51
- 52
- 53
- 54
- 55
- 56
- 57
- 58
- 59
- 60

For peer review only

## COREQ (CONsolidated criteria for REporting Qualitative research) Checklist

A checklist of items that should be included in reports of qualitative research. You must report the page number in your manuscript where you consider each of the items listed in this checklist. If you have not included this information, either revise your manuscript accordingly before submitting or note N/A.

| Topic                                          | Item No. | Guide Questions/Description                                                                                                                              | Reported on Page No. |
|------------------------------------------------|----------|----------------------------------------------------------------------------------------------------------------------------------------------------------|----------------------|
| <b>Domain 1: Research team and reflexivity</b> |          |                                                                                                                                                          |                      |
| <i>Personal characteristics</i>                |          |                                                                                                                                                          |                      |
| Interviewer/facilitator                        | 1        | Which author/s conducted the interview or focus group?                                                                                                   |                      |
| Credentials                                    | 2        | What were the researcher's credentials? E.g. PhD, MD                                                                                                     |                      |
| Occupation                                     | 3        | What was their occupation at the time of the study?                                                                                                      |                      |
| Gender                                         | 4        | Was the researcher male or female?                                                                                                                       |                      |
| Experience and training                        | 5        | What experience or training did the researcher have?                                                                                                     |                      |
| <i>Relationship with participants</i>          |          |                                                                                                                                                          |                      |
| Relationship established                       | 6        | Was a relationship established prior to study commencement?                                                                                              |                      |
| Participant knowledge of the interviewer       | 7        | What did the participants know about the researcher? e.g. personal goals, reasons for doing the research                                                 |                      |
| Interviewer characteristics                    | 8        | What characteristics were reported about the interviewer/facilitator? e.g. Bias, assumptions, reasons and interests in the research topic                |                      |
| <b>Domain 2: Study design</b>                  |          |                                                                                                                                                          |                      |
| <i>Theoretical framework</i>                   |          |                                                                                                                                                          |                      |
| Methodological orientation and Theory          | 9        | What methodological orientation was stated to underpin the study? e.g. grounded theory, discourse analysis, ethnography, phenomenology, content analysis |                      |
| <i>Participant selection</i>                   |          |                                                                                                                                                          |                      |
| Sampling                                       | 10       | How were participants selected? e.g. purposive, convenience, consecutive, snowball                                                                       |                      |
| Method of approach                             | 11       | How were participants approached? e.g. face-to-face, telephone, mail, email                                                                              |                      |
| Sample size                                    | 12       | How many participants were in the study?                                                                                                                 |                      |
| Non-participation                              | 13       | How many people refused to participate or dropped out? Reasons?                                                                                          |                      |
| <i>Setting</i>                                 |          |                                                                                                                                                          |                      |
| Setting of data collection                     | 14       | Where was the data collected? e.g. home, clinic, workplace                                                                                               |                      |
| Presence of non-participants                   | 15       | Was anyone else present besides the participants and researchers?                                                                                        |                      |
| Description of sample                          | 16       | What are the important characteristics of the sample? e.g. demographic data, date                                                                        |                      |
| <i>Data collection</i>                         |          |                                                                                                                                                          |                      |
| Interview guide                                | 17       | Were questions, prompts, guides provided by the authors? Was it pilot tested?                                                                            |                      |
| Repeat interviews                              | 18       | Were repeat interviews carried out? If yes, how many?                                                                                                    |                      |
| Audio/visual recording                         | 19       | Did the research use audio or visual recording to collect the data?                                                                                      |                      |
| Field notes                                    | 20       | Were field notes made during and/or after the interview or focus group?                                                                                  |                      |
| Duration                                       | 21       | What was the duration of the interviews or focus group?                                                                                                  |                      |
| Data saturation                                | 22       | Was data saturation discussed?                                                                                                                           |                      |
| Transcripts returned                           | 23       | Were transcripts returned to participants for comment and/or                                                                                             |                      |

| Topic                                  | Item No. | Guide Questions/Description                                                                                                        | Reported on Page No. |
|----------------------------------------|----------|------------------------------------------------------------------------------------------------------------------------------------|----------------------|
|                                        |          | correction?                                                                                                                        |                      |
| <b>Domain 3: analysis and findings</b> |          |                                                                                                                                    |                      |
| <i>Data analysis</i>                   |          |                                                                                                                                    |                      |
| Number of data coders                  | 24       | How many data coders coded the data?                                                                                               |                      |
| Description of the coding tree         | 25       | Did authors provide a description of the coding tree?                                                                              |                      |
| Derivation of themes                   | 26       | Were themes identified in advance or derived from the data?                                                                        |                      |
| Software                               | 27       | What software, if applicable, was used to manage the data?                                                                         |                      |
| Participant checking                   | 28       | Did participants provide feedback on the findings?                                                                                 |                      |
| <i>Reporting</i>                       |          |                                                                                                                                    |                      |
| Quotations presented                   | 29       | Were participant quotations presented to illustrate the themes/findings?<br>Was each quotation identified? e.g. participant number |                      |
| Data and findings consistent           | 30       | Was there consistency between the data presented and the findings?                                                                 |                      |
| Clarity of major themes                | 31       | Were major themes clearly presented in the findings?                                                                               |                      |
| Clarity of minor themes                | 32       | Is there a description of diverse cases or discussion of minor themes?                                                             |                      |

Developed from: Tong A, Sainsbury P, Craig J. Consolidated criteria for reporting qualitative research (COREQ): a 32-item checklist for interviews and focus groups. *International Journal for Quality in Health Care*. 2007. Volume 19, Number 6: pp. 349 – 357

**Once you have completed this checklist, please save a copy and upload it as part of your submission. DO NOT include this checklist as part of the main manuscript document. It must be uploaded as a separate file.**
